# Supplementary material for: Effect of Rivaroxaban vs Enoxaparin on Major Cardiac Adverse Events and Bleeding Risk in the Acute Phase of Acute Coronary Syndrome: The H-REPLACE Randomized Equivalence and Noninferiority Trial
Source: PubMed Central journal article supplement (PMC9918885; doi:10.1001/jamanetworkopen.2022.55709), 2023-02-10
Supplement: jamanetwopen-e2255709-s001.pdf [file jamanetwopen-e2255709-s001.pdf]

**TABLE OF CONTENTS**

|    |                                                                              |           |
|----|------------------------------------------------------------------------------|-----------|
| 18 | <b>TITLE PAGE .....</b>                                                      | <b>1</b>  |
| 19 | <b>TABLE OF CONTENTS.....</b>                                                | <b>2</b>  |
| 20 | <b>SYNOPSIS .....</b>                                                        | <b>3</b>  |
| 21 | <b>1. BACKGROUND.....</b>                                                    | <b>4</b>  |
| 22 | <b>2. STUDY RATIONALE .....</b>                                              | <b>6</b>  |
| 23 | <b>3. OBJECTIVES.....</b>                                                    | <b>7</b>  |
| 24 | <b>4. STUDY PROTOCOL.....</b>                                                | <b>8</b>  |
| 25 | 4.1 STUDY DESIGN AND DURATION .....                                          | 8         |
| 26 | 4.2 POPULATION .....                                                         | 8         |
| 27 | 4.3 INFORMED CONSENT WAS SIGNED. ....                                        | 10        |
| 28 | 4.4 RANDOMIZATION .....                                                      | 11        |
| 29 | 4.5 TREATMENT .....                                                          | 11        |
| 30 | 4.6 STUDY ENDPOINT.....                                                      | 13        |
| 31 | <b>5. STUDY ASSESSMENTS AND PROCEDURES.....</b>                              | <b>15</b> |
| 32 | 5.1 COLLECTING DATA.....                                                     | 15        |
| 33 | 5.2 STANDARD OPERATING PROCEDURES FOR CLINICAL STUDY DATA RECORDING: .....   | 17        |
| 34 | 5.3 TRIAL MANAGEMENT.....                                                    | 18        |
| 35 | 5.4 PATIENT ADHERENCE MANAGEMENT.....                                        | 19        |
| 36 | 5.5 SUBJECT COMPLETION/WITHDRAW.....                                         | 20        |
| 37 | 5.6 DATA MANAGEMENT.....                                                     | 21        |
| 38 | <b>6. STATISTICAL METHOD.....</b>                                            | <b>22</b> |
| 39 | 6.1 NONINFERIOR MARGIN .....                                                 | 22        |
| 40 | 6.2 SAMPLE SIZE ESTIMATION.....                                              | 22        |
| 41 | 6.3 STATISTICAL ANALYSIS .....                                               | 23        |
| 42 | <b>7. RESEARCH MANAGEMENT.....</b>                                           | <b>24</b> |
| 43 | 7.1 RESEARCH INSTITUTIONS .....                                              | 24        |
| 44 | 7.2 MONITORING AND AUDITING .....                                            | 25        |
| 45 | 7.3 MANAGEMENT AND PRESERVATION OF FILES .....                               | 25        |
| 46 | 7.4 CONSENT PROCEDURE AND CHANGE PROCEDURE OF THE EXPERIMENTAL PROTOCOL..... | 25        |
| 47 | <b>8. ETHICAL REQUIREMENTS.....</b>                                          | <b>26</b> |
| 48 | <b>9. PROTOCOL MODIFICATIONS .....</b>                                       | <b>26</b> |
| 49 | <b>10. REFERENCES .....</b>                                                  | <b>28</b> |

50

51

## SYNOPSIS

52 Acute coronary syndrome (ACS) is a serious and life-threatening condition.  
53 Anticoagulation during the acute phase of ACS is effective in reducing ischemic  
54 events. The most widely used parenteral anticoagulation agent in ACS patients is  
55 enoxaparin. Rivaroxaban is a novel oral anticoagulant with potent anti-Xa activity,  
56 which might be an attractive alternative drug to enoxaparin. In fact, rivaroxaban was  
57 consistently shown to be noninferior to enoxaparin therapy in terms of the reduction  
58 of recurrent venous thromboembolism events. This prospective, multicenter,  
59 open-label, randomized, active-controlled, noninferiority feasibility study is designed  
60 to compare the safety and efficacy of rivaroxaban versus enoxaparin in patients with  
61 ACS who missed the primary reperfusion therapy window and before selective  
62 revascularization. Participants receiving background treatment of aspirin plus  
63 clopidogrel or ticagrelor will be randomly assigned to either oral rivaroxaban 2.5 mg  
64 twice daily or rivaroxaban 5 mg twice daily or subcutaneous enoxaparin 1 mg/kg  
65 twice daily until hospital discharge for a maximum of 8 days or 12 h before  
66 revascularization therapy. The primary safety endpoint is the International Society on  
67 Thrombosis and Hemostasis definition of bleeding events [minor, clinically relevant  
68 nonmajor and major bleeding]. The primary efficacy endpoint is a composite of major  
69 adverse cardiac events (MACEs), including cardiac death, myocardial infarction,  
70 revascularization or stroke, and major bleeding events. Secondary endpoints include  
71 cardiac-related rehospitalization and all-cause death. Patients will be followed for 6

72 months after randomization.

## 73 **1. Background**

### 74 1.1 Acute coronary syndrome (ACS) seriously endangers public health

75       Cardiovascular disease death accounts for the first place in the total deaths of  
76 urban and rural residents in China, with 45% in rural areas and 43% in urban areas;  
77 coronary heart disease is an important cause of death, and acute coronary syndrome  
78 (ACS) is the main cause of coronary heart disease. Types of ACS is a group of  
79 clinical syndromes caused by acute myocardial ischemia, including unstable angina  
80 (UA), ST-segment elevation myocardial infarction (STEMI), and non-ST-segment  
81 elevation myocardial infarction (NSTEMI). ACS is characterized by acute onset,  
82 rapid changes in condition, and poor prognosis. The hospitalized and long-term  
83 mortality rates are 6% and 12%, respectively [1], which seriously endangers social  
84 and public health.

### 85 1.2 ACS anticoagulation and antiplatelet therapy are equally important, and the 86 guidelines recommend the short-term combined use of LMWH+DAPT

87       Regardless of the subtype of ACS, thrombosis and/or thromboembolism are the  
88 predominant pathophysiological mechanisms. Therefore, anticoagulation drugs play  
89 an extremely important role in the treatment of ACS. Platelet activation and  
90 coagulation system activation are two crucial links in the process of thrombosis  
91 and/or thromboembolism; the two are closely linked in the body, and thrombin  
92 generated after coagulation system activation is a powerful platelet activating factor.  
93 Activation of platelets in turn promotes the coagulation process. Antithrombotic

94 therapy should target both the coagulation system (anticoagulation therapy) and  
95 platelets (antiplatelet therapy). DAPT therapy is the cornerstone of the treatment of  
96 ACS patients and has received enough attention in clinical practice, while  
97 anticoagulation therapy is often neglected. Based on evidence from a large number of  
98 high-quality studies, guidelines[2,3] clearly recommend that short-term (less than 8  
99 days) combined use of anticoagulant and antiplatelet drugs for ACS can reduce the  
100 incidence of thrombotic events and improve prognosis in patients with ACS.  
101 Enoxaparin is a low molecular weight heparin with the strongest anticoagulant effect.  
102 The short-term combined use of enoxaparin anticoagulation and aspirin + P2Y12  
103 receptor antagonist dual antiplatelet (DAPT) is a class IA recommendation for  
104 patients with UA, NSTEMI, and STEMI during conservative drug treatment or  
105 waiting for PCI.

106 1.3 The new oral anticoagulant rivaroxaban has obvious advantages over enoxaparin

107 The peak time and half-life of rivaroxaban are superior or noninferior to  
108 enoxaparin[4-6], and rivaroxaban is an oral drug and does not require subcutaneous  
109 injection; the dose is fixed and does not need to be adjusted by body weight. Can  
110 increase compliance. Clinical studies related to anticoagulation in patients with  
111 pulmonary embolism/deep vein thrombosis and hip/knee replacement [7-9] have  
112 confirmed that the safety and efficacy of rivaroxaban are superior or noninferior to  
113 enoxaparin.

114 1.4 Safety of short-term rivaroxaban combined with enoxaparin

115 The ATLAS ACS TIMI 46 study [10] showed that the incidence of clinically

116 significant bleeding (approximately 1.5%-2.5%) in 2.5 mg BID and 5 mg BID in the  
117 short term (8 days) with rivaroxaban combined with DAPT was much lower than that  
118 of enoxaparin. The incidence of bleeding in combination with DAPT is 3% to 9%  
119 [11].

120 In conclusion, we hypothesized that the safety and efficacy of short-term  
121 anticoagulation with rivaroxaban during hospitalization in ACS patients treated with  
122 DAPT is noninferior to enoxaparin.

123

## 124 2. Study rationale

125 This study is a prospective, multicenter, open-label, randomized,  
126 active-controlled, noninferiority feasibility study.

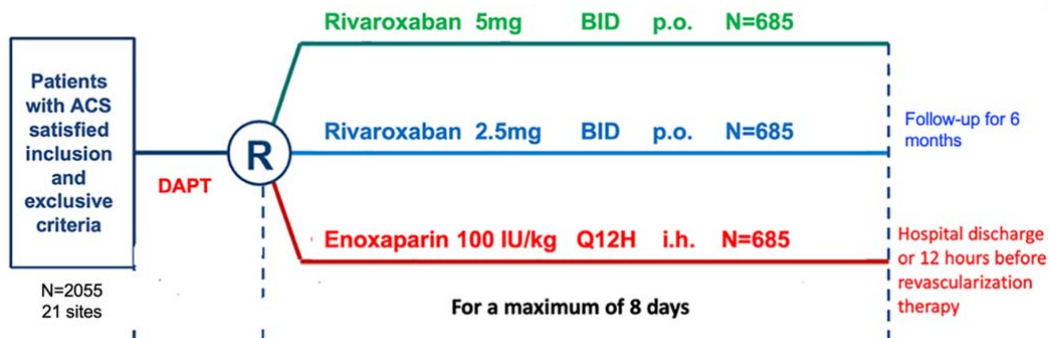

127

128

129 This feasibility trial compared the safety and efficacy of rivaroxaban versus  
130 enoxaparin in patients with ACS who missed the primary reperfusion therapy window  
131 and before selective revascularization. Participants receiving background treatment of  
132 aspirin plus clopidogrel or ticagrelor will be randomly assigned to either oral  
133 rivaroxaban 2.5 mg twice daily or rivaroxaban 5 mg twice daily or subcutaneous

134 enoxaparin 1 mg/kg twice daily until hospital discharge for a maximum of 8 days or  
135 12 h before revascularization therapy. The primary safety endpoint is the International  
136 Society on Thrombosis and Hemostasis definition of bleeding events [minor,  
137 clinically relevant nonmajor and major bleeding]. The primary efficacy endpoint is a  
138 composite of major adverse cardiac events (MACEs), including cardiac death,  
139 myocardial infarction, revascularization or stroke, and major bleeding events.  
140 Secondary endpoints include cardiac-related rehospitalization and all-cause death.  
141 Patients will be followed for 6 months after randomization.

142

### 143 3. Objectives

144 To compare the safety and efficacy of rivaroxaban versus enoxaparin in patients  
145 with ACS who missed the primary reperfusion therapy window and before selective  
146 revascularization.

#### 147 3.1 Primary objective

148 1) Is the bleeding risk (ISTH bleeding) of short-term in-hospital low-dose  
149 rivaroxaban in ACS patients noninferior to low-molecular-weight heparin?

150 2) Is the risk of cardiovascular events (cardiac death, myocardial infarction  
151 (including reinfarction), stroke (ischemic, hemorrhagic and unexplained) and the need  
152 for repeat blood in ACS patients with short-term low-dose rivaroxaban in hospital  
153 noninferior to low molecular weight heparin?

#### 154 3.2 Secondary objective

155 1) Can short-term in-hospital low-dose rivaroxaban in ACS patients reduce

156 psychogenic hospitalization compared with low-molecular-weight heparin?

157 2) Can short-term in-hospital application of low-dose rivaroxaban in ACS  
158 patients reduce all-cause mortality compared with low-molecular-weight heparin?

159

160 4. Study protocol

161 4.1 Study design and duration

162 The H-REPLACE study is a prospective, multicenter, open-label, randomized,  
163 active-controlled, noninferiority feasibility study which is designed to compare the  
164 safety and efficacy of rivaroxaban versus enoxaparin in patients with ACS who  
165 missed the primary reperfusion therapy window and before selective revascularization.  
166 Participants receiving background treatment of aspirin plus clopidogrel or ticagrelor  
167 will be randomly assigned to either oral rivaroxaban 2.5 mg twice daily or  
168 rivaroxaban 5 mg twice daily or subcutaneous enoxaparin 1 mg/kg twice daily until  
169 hospital discharge for a maximum of 8 days or 12 h before revascularization therapy.  
170 The primary safety endpoint is the International Society on Thrombosis and  
171 Hemostasis definition of bleeding events [minor, clinically relevant nonmajor and  
172 major bleeding]. The primary efficacy endpoint is a composite of major adverse  
173 cardiac events (MACEs), including cardiac death, myocardial infarction,  
174 revascularization or stroke, and major bleeding events. Secondary endpoints include  
175 cardiac-related rehospitalization and all-cause death. Patients will be followed for 6  
176 months after randomization.

177 4.2 Population



**Inclusion criteria**

---

- Male or female aged more than 18 years
  - Diagnosed with ACS (STEMI, NSTEMI, unstable angina) who missed primary reperfusion window and before selective revascularization
  - With an indication for short-term combination use of DAPT and enoxaparin.
- 

**Exclusion criteria**

---

- Already received thrombolytic therapy or revascularization or needing revascularization therapy in 12 hours.
- With platelet glycoprotein IIb/IIIa receptor antagonist therapy.
- With increased bleeding risk, such as but not limited to, active internal bleeding, clinically significant bleeding, bleeding at a noncompressible site, or bleeding diathesis within 30 days of randomization; platelet count less than 90,000/ $\mu$ L at screening; intracranial hemorrhage; major surgery, biopsy of a parenchymal organ, or serious trauma within 30 days before randomization; clinically significant gastrointestinal bleeding within 12 months before randomization; an international normalized ratio known to be higher than 1.5 at the time of screening; abciximab bolus or infusion within the preceding 8 hours, or an eptifibatide or tirofiban bolus or infusion within the past 2 hours preceding randomization; or any other condition known to increase the risk of

bleeding.

- Severe concomitant condition or disease, such as cardiogenic shock at the time of randomization, ventricular arrhythmia refractory to treatment at the time of randomization, calculated creatinine clearance  $\leq 30$  mL/min at screening, known significant liver disease (e.g., acute hepatitis, chronic active hepatitis, cirrhosis), or liver function test abnormalities (confirmed with repeat testing) which would require study drug discontinuation, i.e., aminoleucine transferase (ALT) more than  $5 \times$  the upper limit of the normal range (ULN) or ALT more than  $3 \times$  ULN plus total bilirubin more than  $2 \times$  ULN, prior ischemic stroke or transient ischemia attack, anemia (i.e., hemoglobin less than 10 g/dL) at screening, known clinical history of human immunodeficiency virus infection at screening, substance abuse (drug or alcohol) problem within the previous 6 months or any severe condition such as cancer that would limit life expectancy to less than 12 months.
- With an indication for long-term oral anticoagulation therapy such as atrial fibrillation, venous thromboembolism, or prior placement of a mechanical heart valve.
- With other contraindications for use of rivaroxaban and enoxaparin.
- Enrolled in another clinical study.

---

179

180 4.3 Informed consent was signed.

181 All hospitalized ACS patients who met the inclusion and exclusion criteria could  
182 be included in this study after signing the informed consent.

183

#### 184 4.4 Randomization

185 Log into the Interactive Web Response System (website address  
186 <http://222.247.43.186:8008/>), enter information according to the prompts on the  
187 webpage, randomly obtain the group number, and give interventions according to the  
188 groups.

#### 189 4.5 Treatment

##### 190 4.5.1 Intervention method

191 (1) "Rivaxaban 2.5 mg BID" group: 2.5 mg twice a day. Daily oral medication  
192 time is fixed, 12 hours apart.

193 (2) "Rivaxaban 5.0 mg BID" group: 5.0 mg twice a day. Daily oral medication  
194 time is fixed, 12 hours apart.

195 (3) "Enoxaparin 1 mg/kg Q12H" group: twice a day, 1 mg/kg each time. The  
196 dose was strictly calculated according to the body weight before enrollment and was  
197 administered by nurses at a fixed time every day, with an interval of 12 hours.

##### 198 4.5.2 Intervention duration

199 (1) The total duration does not exceed 8 days;

200 (2) Discontinue use more than 12 hours before revascularization, and no longer  
201 use after revascularization;

202 (3) No further application of the intervention after discharge.

203 4.5.3 Concomitant therapy

204 All patients received dual antiplatelet therapy with aspirin (100 mg once daily)  
205 and clopidogrel (75 mg once daily), and the other secondary prevention regimens for  
206 coronary heart disease were determined by the clinic.

207 4.5.4 Study Drug Interruption and Discontinuation

208 1) If the drug is stopped for more than 12 hours before PCI, for example, if PCI  
209 is performed at 8:00 in the morning tomorrow, only the second intervention will be  
210 stopped today;

211 2) If urgent revascularization is needed, the intraoperative heparin dosage should  
212 be adjusted according to ACT.

213 3) All intervention drugs should be used for no more than 8 days and should be  
214 stopped before discharge.

215 4.5.5 Emergency bleeding plan

216 1) Minor bleeding events: close monitoring without drug discontinuation.

217 2) Major bleeding or clinically related nonmajor bleeding events: discontinuation  
218 of the drug, recommended according to the "Chinese Expert Consensus on  
219 Enoxaparin Anticoagulation Therapy in Acute Coronary Syndrome", for shock  
220 patients with excessive blood loss and continuous active bleeding In addition to the  
221 infusion of crystalloids, colloids and fresh frozen plasma and some red blood cells,  
222 such as massive bleeding caused by overdose of anticoagulant drugs, slow  
223 intravenous protamine can neutralize the above symptoms (1 mg protamine can  
224 neutralize the above symptoms). The anticoagulant effect produced by 1 mg of this

225 product), protamine neutralizes the anti-Xa activity of this product by up to 60%. If  
226 necessary, hemostasis under the guidance of image intervention and compression  
227 should be performed according to the bleeding site.

228

## 229 4.6 Study endpoint

### 230 4.6.1 Study endpoint events

231 Study endpoint events included the primary endpoint and secondary endpoints.

232 The primary safety endpoint was bleeding events according to the ISTH  
233 definition during the 6-month follow-up period.

234 The primary efficacy endpoint was a composite of major adverse cardiac events  
235 (MACEs), including cardiac death, myocardial infarction, revascularization or  
236 stroke, during the 6-month follow-up period.

237 Secondary endpoint events included cardiac-related rehospitalization and  
238 all-cause death.

### 239 4.6.2 Endpoint Definitions for H-REPLACE study

#### 240 4.6.2.1 Bleeding events defined by ISTH criteria

241 ISTH major bleeding: Hemoglobin drop of >2 g/dL, transfusion of >2 units  
242 packed red blood cells, symptomatic bleeding in a critical area, or fatal bleeding.

243 ISTH CRNM bleeding: Requires or prolongs hospitalization or results in  
244 laboratory testing, imaging, compression, a procedure, interruption of the study  
245 medication, or a change in concomitant therapies.

246           ISTH Minor bleeding: Overt bleeding that does not meet the criteria for  
247 CRNM or major bleeding.

248

#### 249 4.6.2.2 The primary efficacy endpoint

250           The primary efficacy endpoint was a composite of major adverse cardiac events  
251 (MACEs), including cardiac death, myocardial infarction, revascularization or  
252 stroke, during the 6-month follow-up period.

253           Cardiac death: Attribution of death to a cardiovascular etiology includes acute  
254 myocardial infarction, sudden cardiac death, HF, stroke, cardiovascular procedure,  
255 cardiovascular hemorrhage, and other cardiovascular causes.

256           Myocardial infarction: The categorization and definitions of the types of  
257 myocardial infarction are derived from the “Fourth Universal Definition of  
258 Myocardial Infarction”, the “2014 AHA/ACC Guideline for the Management of  
259 Patients with Non-ST- Elevation Acute Coronary Syndromes”, and the “2015  
260 ACC/AHA/SCAI Guideline for the Management of ST-Elevation Myocardial  
261 Infarction”.

262           Rerevascularization: coronary revascularization procedures needed to treat  
263 symptoms of myocardial ischemia or based solely on coronary anatomic  
264 characteristics during the first 6 months after initial myocardial revascularization.

265           Stroke: stroke is defined on the basis of the presence of acute infarction as  
266 demonstrated by imaging or based on the persistence of symptoms.

#### 267 4.6.2.3 Secondary endpoints

268 Cardiac-related rehospitalization: cardiovascular readmission was defined as  
 269 nonelective repeat hospitalization in all patients alive at discharge for one or more of  
 270 the following: angina, MI, coronary artery bypass graft surgery (CABG),  
 271 nonstaged/nonindex artery PCI, heart failure or stroke.

272 All-cause death was defined as death due to any cause

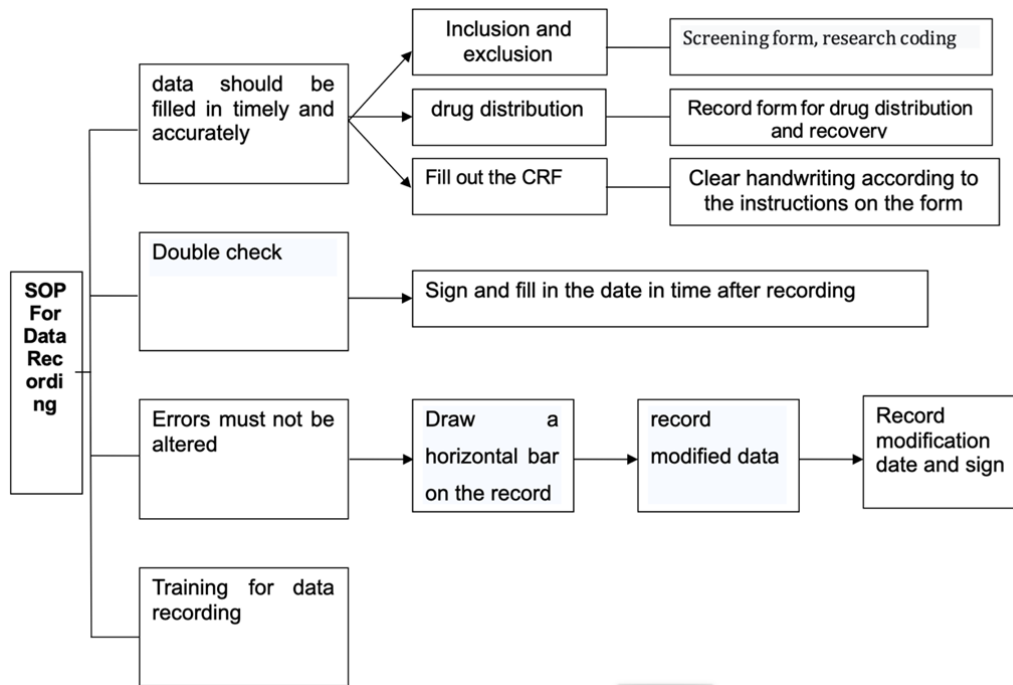

273

274 **5. STUDY ASSESSMENTS AND PROCEDURES**

275 **5.1 Collecting data**

276 To ensure data quality and integrity, all data requested to be collected should be  
 277 documented in the CRF provided by the sponsor. Data will be entered into the CRF  
 278 by the research center or designated party. During the study period, the CRF was  
 279 completed promptly and accurately at each visit. The Principal Investigator or his  
 280 designee should review and sign the CRF for accuracy. Completed CRFs should be

281 sent to the sponsor within 2 weeks of each visit.

282 5.1.1 After confirming that the subjects met the selection conditions and registering  
283 the baseline data, the specific contents included the following aspects:

284 (1) Demographic data, risk factors (hypertension, diabetes, etc.), past medical history  
285 (cardiovascular disease, CABG/PCI history, stroke/TIA, past bleeding history, etc.),  
286 previous treatment (including secondary prevention of coronary heart disease),  
287 antiarrhythmic drugs, other drugs, etc.), history of bad habits (smoking, drinking), and  
288 physical examination.

289 (2) Laboratory tests: liver function, kidney function, blood lipids, myocardial  
290 enzymes, coagulation function, blood routine, etc.

291 (3) Auxiliary examination: electrocardiogram (or dynamic electrocardiogram), cardiac  
292 echocardiography, etc.

293 (4) The total cost and details of inpatient treatment for ACS (detailed list of  
294 hospitalization costs).

295 5.1.2 Follow-up and data collection

296 After the subjects are enrolled in the study, they should be followed up 3 times  
297 according to the follow-up schedule and the medical routine of the selected center,  
298 that is, the first month of discharge and the third month of discharge. Completed by  
299 the follow-up team of the research center by telephone or in-office interview.  
300 Follow-up included clinically significant bleeding, cardiovascular/unknown cause  
301 death, myocardial infarction (including reinfarction), stroke (ischemic, hemorrhagic,  
302 and unexplained) and major ischemic events requiring repeat revascularization, any



303 rehospitalization for reasons, etc.

304

305 **5.2 Standard Operating Procedures for Clinical Study Data Recording:**

306 1) The clinical study data should be filled in the prescribed record book or  
307 predesigned form in a timely and accurate manner.

308 2) Fill in the screening and grouping form and the identification code table in  
309 time when screening the group.

310 3) Drug distribution was performed to fill in the drug distribution and recovery  
311 record form.

312 4) When filling in the original medical record, the data record should be clearly  
313 written, fill in the specified unit of measurement or fill in according to the  
314 instructions for filling in the form.

315 5) double check for review of the record by two reporters.

316 6) Regardless of the kind of original records, if any errors are found in the  
317 records, they shall not be altered. A horizontal bar shall be placed on the  
318 original records to ensure that the original records can be seen clearly, and  
319 then the modified data, modification date and signature shall be recorded.

320 7) Before the clinical start, provide training on the filling of all the original  
321 record forms provided, and provide instructions for filling in complicated  
322 ones.

323 8) Fill in the signature column of the recorder. After recording, you should sign

324

in time and fill in the date as needed.

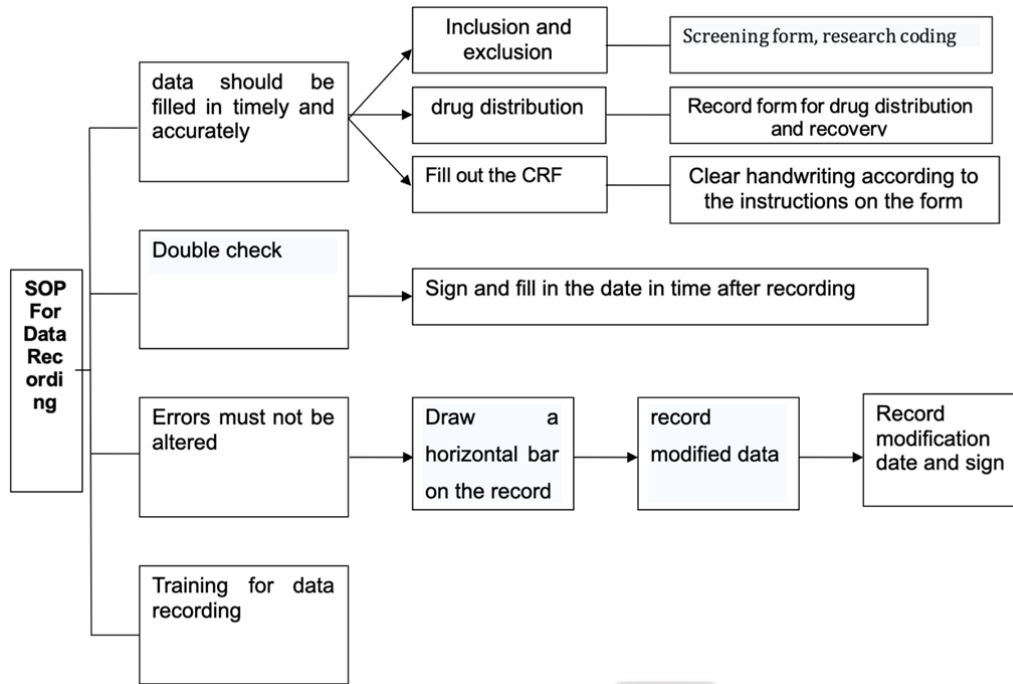

325

326

### 327 5.3 Trial management

#### 328 5.3.1 Training of investigators, clinicians, recorders, enrolled patients:

329 1) Develop training programs to report research endpoint events for investigators,

330 clinicians, recorders, and enrolled patients to avoid false positives and missed reports

331 to the greatest extent possible.

332 2) Conduct simulation exercises for investigators, clinicians, recorders, and

333 enrolled patients to report research endpoint events.

334 3) Special training on the identification, confirmation and reporting of research

335 end-point events that occurred after discharge of enrolled patients.

336 4) Develop an SOP for reporting end-point events.

337           5) The report of the research end point event is finalized by the independent  
338 research end point event adjudication committee.

339

340   5.3.2 Recording, processing and reporting procedures:

341           1) Investigators, clinicians, and recorders who have undergone rigorous training  
342 and assessment have the responsibility and obligation to record and report research  
343 endpoint events in a timely and correct manner.

344           2) Suspicious events should be directly inquired about the events obtained by  
345 direct inquiries based on observations and questions similar to “Since the last  
346 inspection, how do you feel differently?” to ensure the objectivity of the inquiry  
347 results. The details of the study endpoint events were recorded as needed.

348           3) Investigators, clinicians and recorders who have undergone rigorous training  
349 and assessment shall report in strict accordance with the judgment standards in the  
350 research protocol.

351           4) After the 24-hour adverse event warning phone receives the suspicious event  
352 reported by the patient, it will be determined within 2 hours that one-to-one  
353 investigators will arrange for the tracking, identification and related data recording of  
354 the suspicious event and complete the report within 24 hours.

355

#### 356   **5.4 Patient Adherence Management**

357           Since the intervention in this study was in-hospital treatment, compliance with

358 the study intervention was not involved. Therefore, the compliance of subjects with  
359 follow-up is the key to ensuring the quality of this study. Subject study compliance  
360 management should be initiated as early as possible and throughout the study.

#### 361 5.4.1 Group information management

362 After signing the informed consent form, the contact information of the subjects  
363 and their families was kept as much as possible and recorded in the CRF form.

#### 364 5.4.2 Communication Contact Management

365 After signing the informed consent form and obtaining the consent of the  
366 patients or their families, they were included in the WeChat patient follow-up  
367 management group. Patient follow-up reminders, suspicious event tracking, etc., can  
368 be carried out through WeChat, SMS and other communication forms.

#### 369 5.4.3 Research information EDC system reminder

370 Set up the follow-up reminder function before the follow-up node to ensure that  
371 the subjects arrange the follow-up plan in time.

### 372 **5.5 Subject completion/withdraw**

#### 373 5.5.1 Completion

374 A subject will be considered to have completed the study if he or she has reached  
375 any endpoint before the end-of-study visit or completed the end-of-study visit.

#### 376 5.5.2 Withdrawal from the Study

377 A subject will be withdrawn from the study for any of the following reasons:

- 378 • Lost to follow-up

- 379 • Withdrawal of consent
- 380 • Death
- 381 • Other (for example, where there is failure to meet inclusion/exclusion criteria,  
382 or when it is considered that the subject may be placed at an increased risk)

383 In case a subject is lost to follow-up, every possible effort will be made,  
384 including the possible use of locator agencies, to contact the subject and determine the  
385 endpoint status and reason for discontinuation as local law permits. The measures  
386 taken for follow-up must be documented. Subjects who withdraw consent for further  
387 study drug administration will be encouraged to remain in the study for endpoint  
388 event assessment. In addition, information on the final status will be obtained as  
389 frequently as necessary (if permitted by local law).

390 When a subject withdraws before completing the study, the reason for  
391 withdrawal is to be documented in the CRF and in the source document and will be  
392 contacted for survival status at the end of the study. Study drug assigned to the  
393 withdrawn subject may not be assigned to another subject. Subjects who withdraw  
394 will not be replaced.

## 395 **5.6 Data management**

396 An IDMC will be established to monitor the progress of the study and ensure that the  
397 safety of subjects enrolled in the study is not compromised. The IDMC will include,  
398 but is not limited to, a clinical chairman, physician(s) experienced in clinical studies,  
399 but not participating in this study, and at least 1 statistician. Details of the composition,

400 roles, responsibilities, and processes of the IDMC will be documented in its charter.

## 401 **6. Statistical method**

### 402 **6.1 Noninferior margin**

403 To determine the non-inferiority margin of the primary efficacy endpoint, we referred  
404 to the publication of NEJM.<sup>12</sup>

405 Regarding the primary safety endpoint (bleeding event), we had not found the  
406 published study with the same endpoint. We just estimated the potential margin  
407 according to the “fixed margin approach” recommended by FDA<sup>13</sup> based on the  
408 parameter regarding major bleeding events from a meta-analysis,<sup>14</sup> which reported  
409 LMWH was associated with a significantly increased risk of major bleeding (OR 2.26,  
410 95% CI 1.63–3.14), therefore we could get the square root of the lower bound of the  
411 95 percent confidence interval of 1.63, that is 1.28. Moreover, margin of (0.8, 1.25) is  
412 usually used in bioequivalence studies.<sup>15</sup> The non-inferiority margin of the primary  
413 safety endpoint was finally set at 1.24 in our trial with conservative clinical  
414 determination.

415 Both noninferior margins were determined before randomization of the first patient.

### 416 **6.2 Sample Size Estimation**

417 As a feasible pilot trial, approximately 2000 patients were expected to be  
418 enrolled during the study period.

### 419 **6.3 Analysis Sets**

420 ITT and PP analyses are planned for both safety and efficacy endpoints.

421 Intention-to-treat population (ITT): This analysis set included all randomized  
422 patients.

423 Per-protocol analysis (PP set): Refers to subjects who do not have serious  
424 protocol violations in terms of inclusion and exclusion criteria, treatment, and  
425 measurement of main indicators. The analysis was performed after the population  
426 withdrew from the study.

## 427 **6.3 Statistical analysis**

### 428 6.3.1 Baseline and demographic analysis

429 Depending on the type of data, a t test or analysis of variance will be used for  
430 measurement data, and the chi-square test will be used for enumeration data.  
431 Subgroup analyses of study endpoints will be performed based on baseline and  
432 demographic characteristics.

433 Age, sex, BMI, creatinine clearance, smoking, combined hypertension, diabetes,  
434 hyperlipidemia, previous myocardial infarction, previous PCI/CABG, previous stroke,  
435 type of ACS, revascularization received in current ACS, and drug therapy Wait.

### 436 6.3.2 Analysis of primary and secondary study endpoints

437 A Cox regression model was used to analyze the noninferiority of the direct  
438 event rates between the two low-dose rivaroxaban groups and the enoxaparin group  
439 and obtained HR and 95% confidence interval. The p value for inferiority was  
440 calculated based on the estimate, SE and cutoff value obtained from Cox regression,

441 and the formula was  $p$  value for noninferiority=  
442  $\text{PROBNORM}[(\text{estimate}-\text{LN}(L))/\text{SE}]$ .

#### 443 6.3.4 Subgroup analysis

444 According to population and baseline data, according to age (whether greater  
445 than 65 years old), BMI (whether greater than 25 kg/m<sup>2</sup>), creatinine clearance rate  
446 (whether less than 50 ml/min), smoking, past medical history (hypertension, diabetes,  
447 hyperlipidemia), subgroup analysis was performed for previous myocardial infarction,  
448 previous revascularization, stroke), and the type of current ACS, and an interaction  $p$   
449 value less than 0.05 was considered to be different between subgroups.

### 450 **7. Research Management**

#### 451 **7.1 Research institutions**

452 This project is a multicenter, prospective, randomized, controlled clinical study  
453 organized and implemented by the Second Xiangya Hospital of Central South  
454 University using a unified research protocol and CRF form. Each center entered the  
455 CRF form, which was compiled by the Second Xiangya Hospital of Central South  
456 University and was responsible for statistical analysis. After study  
457 termination/completion, subjects continued to receive routine care at each center.

458 Lead unit: The Second Xiangya Hospital of Central South University

459 Project leader: Professor Zhou Shenghua from the Second Xiangya Hospital of  
460 Central South University



461 **7.2 Monitoring and Auditing**

462 This study must strictly comply with the relevant regulations promulgated by the  
463 State Drug Administration of China, the Good Clinical Practice (GCP), and the  
464 Declaration of Helsinki (October 2000, Scotland).

465 Check the CRF form on a regular basis, and go to each center to monitor the  
466 original documents (select 10%-20% of the cases).

467 Raw files include printed, optical or electronic documents of raw data that can be  
468 used as raw files, such as hospital records, laboratory reports, instrument inventory  
469 records, radiographs, etc. Research centers and laboratories should keep original  
470 documents related to research. Copies of the original documents and printed copies of  
471 the original electronic documents should also be retained, signed and dated by the  
472 staff of the research center and marked as consistent with the original documents.

473 **7.3 Management and preservation of files**

474 Data collection method: A handwritten case report form was kept by each  
475 research center, and a CRF form was completed. Each center kept the electronic  
476 medical records of patients in its own unit, and the lead unit kept the electronic  
477 medical records of all centers. The electronic medical record is designed and  
478 maintained by the lead unit.

479 **7.4 Consent procedure and change procedure of the experimental protocol**

480 Each center can propose amendments to the test plan and report it to the lead unit.

481 After discussion, the changes were sent to each center.

## 482 **8. Ethical requirements**

483 Before the start of the study, the relevant documents will be submitted to the  
484 independent ethics committee (IEC) of the lead unit for review, and the  
485 implementation will begin after obtaining the approved documents. When the patients  
486 were selected, the research process was explained to the patients, the informed  
487 consent form was obtained, and the time was signed and recorded. Each center will  
488 protect the rights and interests of all subjects and keep personal data confidential.

## 489 **9. Protocol Modifications**

### 490 **Modification 1:** Follow-up time for primary endpoints

491 The follow-up time for primary endpoints was changed from 6 months to 12 months  
492 on March 2019 and changed back to 6 months on October 2020.

493 The follow-up time for the primary endpoints of the H-REPLACE study was set as 6  
494 months in the NCT (<https://clinicaltrials.gov/ct2/show/NCT03363035>), which was  
495 registered on November 29, 2017. We submitted the rationale of the H-REPLACE  
496 study as a paper to a journal. We followed the reviewer's comments and agreed to  
497 change the follow-up time from 6 months to 12 months in the design paper. This  
498 change was made without authorization from the ethics committees of the Second  
499 Xiangya Hospital of Central South University. The ethics committees of the Second

500 Xiangya Hospital of Central South University discussed this issue and refused the  
501 change in October 2020. The initial objective of this study was to explore whether  
502 rivaroxaban can be a substitution for enoxaparin during the acute phase of ACS. The  
503 use of a 12-month time-window in the noninferiority assessment of safety and  
504 efficacy of an antithrombotic trial regimen given for the first 4 days only may increase  
505 the false-positive rate (alpha error) in the trial, as the addition of events that do not  
506 bear on the randomized treatment might increase the power of the trial. Therefore, we  
507 finally set the follow-up time for primary endpoints to 6 months with the approval of  
508 ethics committees. And we have also sent an application letter to the journal and  
509 publishers for the amendment of related contents in the published paper.

510 **Modification 2:** Sample size calculation

511 We found that the methods for sample size calculation were totally wrong during the  
512 period of the research execution. With the noninferiority margins mentioned above, it  
513 would have required sample sizes of 5655 of 18161 patients in each group.  
514 Furthermore, data monitoring committees found that the actual incidence of the  
515 primary endpoint was much lower than expected. Thus the principal investigator and  
516 steering committees finally decided to change the study to a feasibility trial with a  
517 sample size of approximately 2000 patients for the three arms.

518

519 **10. References**

520 [1] Amsterdam Ezra A, Wenger Nanette K, Brindis Ralph G, et al. 2014 AHA/ACC  
521 Guideline for the Management of Patients with Non-ST-Elevation Acute Coronary  
522 Syndromes: a report of the American College of Cardiology/American Heart  
523 Association Task Force on Practice Guidelines. *J. Am. Coll. Cardiol*, 2014, 64(24):  
524 e139-e228.

525 [2] Ibanez Borja, James Stefan, Agewall Stefan, et al. 2017 ESC Guidelines for the  
526 management of acute myocardial infarction in patients presenting with ST-segment  
527 elevation: The Task Force for the management of acute myocardial infarction in  
528 patients presenting with ST-segment elevation of the European Society of Cardiology  
529 (ESC). *Eur. Heart J.*, 2017. doi:10.1093/eurheartj/ehx393

530 [2] Amsterdam Ezra A, Wenger Nanette K, Brindis Ralph G, et al. 2014 AHA/ACC  
531 Guideline for the Management of Patients with Non-ST-Elevation Acute Coronary  
532 Syndromes: a report of the American College of Cardiology/American Heart  
533 Association Task Force on Practice Guidelines. *J. Am. Coll. Cardiol.*, 2014, 64(24):  
534 e139-e228.

535 [3] Heidbuchel Hein, Verhamme Peter, Alings Marco, et al. Updated European Heart  
536 Rhythm Association practical guide on the use of nonvitamin-K antagonist  
537 anticoagulants in patients with nonvalvular atrial fibrillation: Executive summary. *Eur.*  
538 *Heart J.*, 2017, 38(27): 2137-2149.

539 [4] FDA: <http://www.drugfuture.com/fda/drugview/020164>

540 [5] FDA: <http://www.drugfuture.com/fda/drugview/022406>

541 [6] Kakkar Ajay K, Brenner Benjamin, Dahl Ola E, et al. Extended duration  
542 rivaroxaban versus short-term enoxaparin for the prevention of venous  
543 thromboembolism after total hip arthroplasty: a double-blind, randomized controlled  
544 trial. *Lancet*, 2008, 372(9632): 31-39.

545 [7] Prins Martin H, Bamber Luke, Cano Stefan J, et al. Patient-reported treatment  
546 satisfaction with oral rivaroxaban versus standard therapy in the treatment of  
547 pulmonary embolism; results from the EINSTEIN PE trial. *Thromb. Res*, 2015,  
548 135(2): 281-288.

549 [8] Turpie Alexander G G, Lassen Michael R, Davidson Bruce L, et al. Rivaroxaban  
550 versus enoxaparin for thromboprophylaxis after total knee arthroplasty (RECORD4):  
551 a randomized trial. *Lancet*, 2009, 373(9676): 1673-1680.

552 [9] Beyer-Westendorf Jan, Lensing Anthonie W A, Arya Roopen, et al. Choosing  
553 wisely: The impact of patient selection on efficacy and safety outcomes in the  
554 EINSTEIN-DVT/PE and AMPLIFY trials. *Thromb Res*, 2017, 149: 29-37.

555 [10] Geller Bram J, Mega Jessica L, Morrow David A, et al. Autoantibodies to  
556 phosphorylcholine and cardiovascular outcomes in patients with acute coronary  
557 syndromes in the ATLAS ACS-TIMI 46 trial. *J. Thromb. Thrombolysis*, 2014, 37(3):  
558 310-316.

559 [11] Spinler Sarah A, Inverso Stephanie M, Cohen Marc, et al. Safety and efficacy of  
560 unfractionated heparin versus enoxaparin in patients who are obese and patients with  
561 severe renal impairment: analysis from the ESSENCE and TIMI 11B studies. *Am.*  
562 *Heart J*, 2003, 146(1): 33-41.

563 [12] Fifth Organization to Assess Strategies in Acute Ischemic Syndromes  
564 Investigators, Yusuf Salim, Mehta Shamir R, et al. Comparison of fondaparinux and  
565 enoxaparin in acute coronary syndromes. *N Engl J Med.* 2006;354(14): 1464-1476.

566 [13] US Department of Health and Human Services, US Food and Drug  
567 Administration, Center for Biologics Evaluation and Research (CBER). Guidance for  
568 industry non-inferiority clinical trials. Published March 2010. Accessed April  
569 8,2022.[www.fda.gov/downloads/drugs/guidancecomplianceregulatoryinformation/guidances/ucm202140.pdf](http://www.fda.gov/downloads/drugs/guidancecomplianceregulatoryinformation/guidances/ucm202140.pdf).

571 [14] Eikelboom JW, Anand SS, Malmberg K, Weitz JI, Ginsberg JS, Yusuf S.  
572 Unfractionated heparin and low-molecular-weight heparin in acute coronary syndrome  
573 without ST elevation: a meta-analysis. *Lancet.* 2000;355(9219):1936-1942.

574 [15] U.S. Department of Health and Human Services, Food and Drug Administration,  
575 Center for Drug Evaluation and Research (CDER). Guidance for industry: statistical  
576 Approaches to Establishing Bioequivalence. Published April 29, 2020.  
577 <http://www.fda.gov/downloads/drugs/guidancecomplianceregulatoryinformation/guidances/ucm070244.pdf>.

579

580

---

**Statistical Analysis Plan**

Study Code << NCT03363035 >>

Edition Number << 4.0 >>

Date <<20/October/2020>>

---

---

**Safety and efficacy of low-dose rivaroxaban in the acute phase of acute coronary syndrome: an open-label, randomized, noninferiority comparison (H-REPLACE)**

---

**TABLE OF CONTENTS**

1

2 TITLE PAGE ..... 1

3 TABLE OF CONTENTS.....2

4 AMENDMENT HISTORY .....4

5 1 INTRODUCTION .....5

6 2 STUDY OBJECTIVES.....6

7 3 STUDY DESIGN .....7

8 4 GENERAL STATISTICAL CONSIDERATIONS .....8

9 4.1 General Principles.....8

10 4.2 Handling of Noncompliance to Study Treatment or Follow up .....9

11 4.3 Handling of Missing Data.....10

12 4.4 Data Monitoring .....11

13 4.5 Determination of sample size .....12

14 4.6 Determination of Noninferiority margins.....12

15 5 ANALYSIS SETS.....13

16 5.1 Assignment of analysis sets.....13

17 5.1.1 Intention-to-treat analysis set (ITT).....13

18 5.1.2 Per-protocol analysis set (PP).....13

19 5.1.3 Safety analysis set (SAF).....13

20 6 STATISTICAL METHODOLOGY.....14

21 6.1 Population characteristics .....14

22 6.1.1 Demographics .....14

23 6.1.2 Medical history .....15

24 6.1.3 Protocol Deviations .....15

25 6.1.4 Prior and concomitant medications .....16

26 6.2 Efficacy.....16

27 6.2.1 Primary efficacy variable.....16



28 6.2.2 Primary safety variable ..... 16

29 6.2.3 Secondary efficacy variable..... 17

30 6.2.4 Subgroup variables ..... 17

31 6.2.5 Sequential analyses..... 18

32 6.2.6 Analysis of the primary safety variable..... 19

33 6.2.7 Analysis of the primary efficacy variable..... 19

34 6.2.8 Analysis of the secondary efficacy variable ..... 20

35 6.2.9 Subgroup Analyses ..... 20

36 6.2.10 Sensitivity analyses..... 20

37 7 DOCUMENT HISTORY AND CHANGES IN THE PLANNED

38 STATISTICAL ANALYSIS..... 21

39 7.1 Overview Changes to SAP ..... 21

40 8 REFERENCES ..... 23

41

42 **AMENDMENT HISTORY**

| <b>Category*:<br/>Change refers to</b>     | <b>Date</b>         | <b>Description of change</b>                                                                                                                                                    |
|--------------------------------------------|---------------------|---------------------------------------------------------------------------------------------------------------------------------------------------------------------------------|
| <<Followup time>>                          | <<3/March/2019>>    | << The follow-up time for primary endpoints were changed from 6 months to 12 months on March 2019 and changed back to 6 months on October 2020 due to clinical consideration.>> |
| <<Sample size calculation and study type>> | <<10/October/2020>> | << Methods for sample size calculation was wrong and the study type was changed to be feasibility trial with a sample size around 2000 patients>>                               |

43

44

## 45 **1 INTRODUCTION**

46 Cardiovascular disease death accounts for the first place in the total deaths of urban and rural  
47 residents in China, with 45% in rural areas and 43% in urban areas; coronary heart disease is  
48 an important cause of death, and acute coronary syndrome (ACS) is the main cause of  
49 coronary heart disease. Types of ACS is a group of clinical syndromes caused by acute  
50 myocardial ischemia, including unstable angina (UA), ST-segment elevation myocardial  
51 infarction (STEMI), and non-ST-segment elevation myocardial infarction (NSTEMI). ACS is  
52 characterized by acute onset, rapid changes in condition, and poor prognosis. The hospitalized  
53 and long-term mortality rates are 6% and 12%, respectively [1], which seriously endangers  
54 social and public health.

55       Regardless of the subtype of ACS, thrombosis and/or thromboembolism are the  
56 predominant pathophysiological mechanisms. Therefore, anticoagulation drugs play an  
57 extremely important role in the treatment of ACS. Platelet activation and coagulation system  
58 activation are two crucial links in the process of thrombosis and/or thromboembolism; the two  
59 are closely linked in the body, and thrombin generated after coagulation system activation is a  
60 powerful platelet activating factor. Activation of platelets in turn promotes the coagulation  
61 process. Antithrombotic therapy should target both the coagulation system (anticoagulation  
62 therapy) and platelets (antiplatelet therapy). DAPT therapy is the cornerstone of the treatment  
63 of ACS patients and has received enough attention in clinical practice, while anticoagulation  
64 therapy is often neglected. Based on evidence from a large number of high-quality studies,  
65 guidelines[2,3] clearly recommend that short-term (less than 8 days) combined use of  
66 anticoagulant and antiplatelet drugs for ACS can reduce the incidence of thrombotic events

67 and improve prognosis in patients with ACS. Enoxaparin is a low molecular weight heparin  
68 with the strongest anticoagulant effect. The short-term combined use of enoxaparin  
69 anticoagulation and aspirin + P2Y12 receptor antagonist dual antiplatelet (DAPT) is a class IA  
70 recommendation for patients with UA, NSTEMI, and STEMI during conservative drug  
71 treatment or waiting for PCI.

72 The peak time and half-life of rivaroxaban are superior or non-inferior to enoxaparin[4-6],  
73 and rivaroxaban is an oral drug and does not require subcutaneous injection; the dose is fixed  
74 and does not need to be adjusted by body weight. Can increase compliance. Clinical studies  
75 related to anticoagulation in patients with pulmonary embolism/deep vein thrombosis and  
76 hip/knee replacement [7-9] have confirmed that the safety and efficacy of rivaroxaban are  
77 superior or non-inferior to enoxaparin.

78 The ATLAS ACS TIMI 46 study [10] showed that the incidence of clinically significant  
79 bleeding (approximately 1.5%-2.5%) in 2.5 mg BID and 5 mg BID in the short term (8 days)  
80 with rivaroxaban combined with DAPT was much lower than that of enoxaparin. The  
81 incidence of bleeding in combination with DAPT is 3% to 9% [11].

82 In conclusion, we hypothesized that the safety and efficacy of short-term anticoagulation  
83 with rivaroxaban during hospitalization in ACS patients treated with DAPT is non-inferior to  
84 enoxaparin.

## 85 **2 STUDY OBJECTIVES**

86 To compare the safety and efficacy of rivaroxaban versus enoxaparin in patients with ACS  
87 who missed the primary reperfusion therapy window and before selective revascularization.

88 2.1 Primary objective

89 1) Is the bleeding risk (ISTH bleeding) of short-term in-hospital low-dose rivaroxaban in ACS  
90 patients non-inferior to low-molecular-weight heparin?

91 2) Is the risk of cardiovascular events (cardiac death, myocardial infarction (including  
92 reinfarction), stroke (ischemic, hemorrhagic and unexplained) and the need for repeat blood in  
93 ACS patients with short-term low-dose rivaroxaban in hospital noninferior to low molecular  
94 weight heparin?

95 2.2 Secondary objective

96 1) Can short-term in-hospital low-dose rivaroxaban in ACS patients reduce psychogenic  
97 hospitalization compared with low-molecular-weight heparin?

98 2) Can short-term in-hospital application of low-dose rivaroxaban in ACS patients reduce all-  
99 cause mortality compared with low-molecular-weight heparin?

100 **3 STUDY DESIGN**

101 This study is a prospective, multicenter, open-label, randomized, active-controlled,  
102 noninferiority feasibility study.

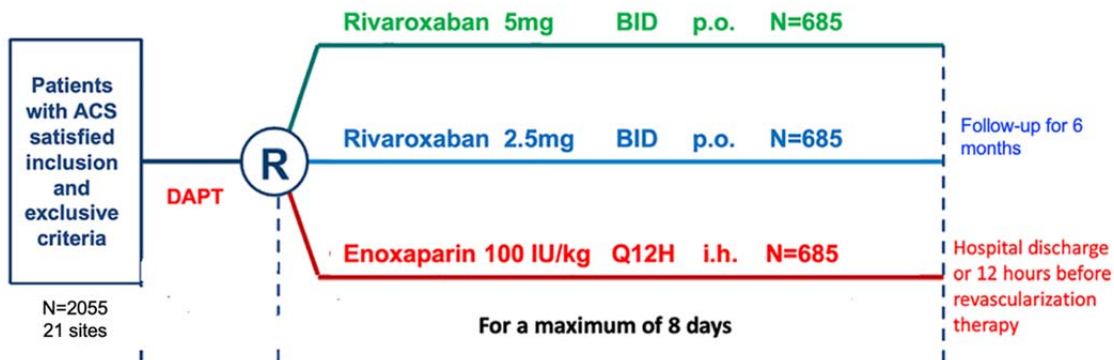

103

104 This prospective, randomized, open-label, active-controlled, multicenter study is designed to  
 105 compare the safety and efficacy of rivaroxaban versus enoxaparin in patients with ACS who  
 106 missed the primary reperfusion therapy window and before selective revascularization.  
 107 Participants receiving background treatment of aspirin plus clopidogrel or ticagrelor will be  
 108 randomly assigned to either oral rivaroxaban 2.5 mg twice daily or rivaroxaban 5 mg twice  
 109 daily or subcutaneous enoxaparin 1 mg/kg twice daily until hospital discharge for a maximum  
 110 of 8 days or 12 h before revascularization therapy. The primary safety endpoint is the  
 111 International Society on Thrombosis and Hemostasis definition of bleeding events [minor,  
 112 clinically relevant nonmajor and major bleeding]. The primary efficacy endpoint is a  
 113 composite of major adverse cardiac events (MACEs), including cardiac death, myocardial  
 114 infarction, revascularization or stroke, and major bleeding events. Secondary endpoints  
 115 include cardiac-related rehospitalization and all-cause death. Patients will be followed for 6  
 116 months after randomization.

117 **4 GENERAL STATISTICAL CONSIDERATIONS**

118 **4.1 General Principles**

119 The variables will be analyzed using descriptive statistics. As appropriate, metric data will be

120 calculated to be the number of available data and missing data, the mean, the standard  
121 deviation, the minimum, the quartiles, the median, and the maximum. Frequency tables will  
122 be generated for categorical data. The statistical analysis will be performed using SAS version  
123 9.2 or higher (SAS Institute Inc., Cary, NC, USA).

#### 124 **4.2 Handling of Noncompliance to Study Treatment or Follow up**

125 Patients who discontinue treatment or study follow-up at an excessive rate may make the trial  
126 unintelligible. Data on outcomes and vital status will be collected throughout the study, even if  
127 patients stop taking study medications. Hence, all randomized patients' clinical data will be  
128 collected at the trial close-out as far as possible.

129 Subjects who sign an informed consent form and, for any reason (e.g., failing to meet  
130 inclusion and exclusion criteria), terminate the study before being randomized are referred to  
131 as a "screening failure".

132 For any reason, a randomized subject who permanently discontinued the study treatment  
133 before their End of Treatment Visit was considered to have permanently discontinued the  
134 study medication (including subjects who were randomized but never started taking any study  
135 medication). Study medication will be permanently discontinued based on the reason for  
136 discontinuation.

137 If subjects permanently discontinued study medication, different options of follow-up were  
138 discussed to collect outcome events and vital status. It can include regular study visits, regular  
139 telephone contacts with the patient or the general practitioner, or contact at the end of the  
140 study. If patients do not agree to attend regular study visits, the investigator will encourage

141 them to attend at least one final assessment visit to the greatest extent possible as outlined for  
142 the End of treatment Visit.

143 All randomized subjects will be encouraged to remain on study treatment and under  
144 observation for the duration of the study. Informed consent cannot be withdrawn by  
145 discontinuing study treatment. In cases where subjects indicate they do not want to  
146 “continue”, investigators must determine whether this refers to discontinuation of study  
147 treatment, unwillingness to attend follow-up visits, unwillingness to have telephone contact,  
148 unwillingness to have any contact with study personnel, or unwillingness to allow contact  
149 with a third party (e.g., family member, doctor). To determine the survival status of all  
150 subjects at the end of the study, every effort will be made to follow up on them. Only a very  
151 small number of individuals are anticipated to have incomplete follow-up (in any manner)  
152 during this trial.

153 A subject will be declared to have incomplete follow-up or to be lost to follow-up (i.e., to be  
154 completely noncompliant to follow-up) if, despite all possible efforts, all investigators and  
155 dedicated site staff are not able to contact the subject or a third party (e.g., family member,  
156 doctor). As local law allows, every effort will be made to contact the subject or a third party  
157 and to determine the endpoint, survival status, and reason for discontinuation. The subject will  
158 not be classified as lost to follow-up if the database documents that the subject is alive at the  
159 end of the study.

### 160 **4.3 Handling of Missing Data**

161 In the subject data listing, all missing or partial data will be listed as they appear on the CRF,  
162 including the best estimate date of site investigators (see below) collected in the clinical data.



### 163 **Missing or incomplete event dates**

164 Site investigators are asked to provide their best estimate of the event date when an event date  
165 is unknown. Although the precise date of an occurrence is unknown, the investigator  
166 frequently has knowledge of details that would indicate the date's approximation, such as the  
167 first week of a month, in the fall of a year, or the middle of a particular year, or at least the  
168 date when the subject was last seen or contacted. It is likely that the estimated date recorded  
169 by the computer program will be closer to the true date than the date produced by an  
170 uninformed computer program if this information is incorporated into it. The estimated date  
171 should be the middle date within the period when the event is known to have taken place. A  
172 date in the middle of a month should be used as an estimate if the event occurred in the first  
173 week of the month. The middle date in the fall is the appropriate estimate if it occurred in the  
174 fall. I The date in the middle of the plausible time period should be given if no information is  
175 known about the subject prior to the event (start date of plausible time period) and the date of  
176 contact when information about the event was known (end date of plausible time period). It  
177 has been used in many studies and is recommended by Dubois for date estimation [12].

178 To be conservative, if date/time information is not sufficient to determine whether an event  
179 occurred before or after randomization, it is considered an outcome. The event start date will  
180 be imputed no earlier than the randomization date.

## 181 **4.4 Data Monitoring**

182 To assess the efficacy and safety of the study, the IDMC will review unblinded event rates. All  
183 (unblinded) statistical analyses for the IDMC will be performed by the ISAC (Independent  
184 Statistical Analysis Centre).

185 Overall blinded event rates will be reviewed by the steering committee to ensure that they  
186 meet protocol projections. The trial design may be changed if overall event rates are lower  
187 than expected, including an increase in sample size or an extension of study duration without  
188 prior knowledge of any treatment effect.

#### 189 **4.5 Determination of sample size**

190

#### 191 **4.6 Determination of Noninferiority margins**

192 To determine the non-inferiority margin of the primary efficacy endpoint, we referred to the  
193 publication of NEJM[14] (Comparison of fondaparinux and enoxaparin in acute coronary  
194 syndromes, the margin was 1.185 in this paper).

195 Regarding the primary safety endpoint (bleeding event), we did not find a published study  
196 with the same endpoint. We estimated the potential margin according to the “fixed margin  
197 approach” [15] recommended by the FDA based on the parameter regarding major bleeding  
198 events from a meta-analysis,[13] which reported that LMWH was associated with a  
199 significantly increased risk of major bleeding (OR 2.26, 95% CI 1.63–3.14); therefore, we  
200 obtained the square root of the lower bound of the 95% confidence interval of 1.63, that is,  
201 1.28. Moreover, a margin of (0.8, 1.25) is usually used in bioequivalence studies. [16] The  
202 non-inferiority margin of the primary safety endpoint was finally set at 1.24 in our trial with  
203 conservative clinical determination.

204

## 205 **5 ANALYSIS SETS**

206 As a pilot feasible trial, around 2000 patients were expected to be enrolled during the study  
207 period.

### 208 **5.1 Assignment of analysis sets**

209 All subjects who were randomized in the H-REPLACE study were eligible for assignment to  
210 the analysis sets.

#### 211 **5.1.1 Intention-to-treat analysis set (ITT)**

212 All participants who were randomly assigned will be included in the intention-to-treat analysis  
213 set, also known as the full analysis set in the International Conference on Harmonization  
214 (ICH) E9 standard.

#### 215 **5.1.2 Per-protocol analysis set (PP)**

216 PP set Refers to subjects who do not have serious protocol violations in terms of inclusion and  
217 exclusion criteria, treatment, and measurement of main indicators. The analysis was  
218 performed after the population withdrew from the study.

#### 219 **5.1.3 Safety analysis set (SAF)**

220 All randomized subjects who received at least one dose of study medication will be included  
221 in the safety analysis set.

## 222 **6 STATISTICAL METHODOLOGY**

### 223 **6.1 Population characteristics**

#### 224 **6.1.1 Demographics**

225 In the ITT and SAF, baseline characteristics and demographics will be summarized by  
226 treatment group and overall. Metric variables will be presented in summary statistics.  
227 Frequency tables will be presented for categorical variables.

228 An individual's demographic information includes their age, gender, race, ethnicity, body  
229 height, weight, and body mass index (BMI). Age, body weight, and BMI will each be given as  
230 continuous variables and categorized into the following categories:

231  Age:  $<65$ ;  $\geq 75$  years

232  BMI:  $< 25$ ;  $\geq 25\text{kg/m}^2$

233 The following additional baseline characteristics will be analysed:

234  creatinine clearance:  $<50$ ;  $\geq 50 \text{ mL/min/1.73m}^2$

235  Hypertension: yes or no

236  Diabetes: yes or no

237  Dyslipidemia: yes or no

238  Heart failure: yes or no

239  Previous myocardial infarction

- 240  Previous PCI or CABG
- 241  Previous stroke
- 242  Tobacco use: never, former, current
- 243  Index diagnosis: STEMI, NSTEMI or unstable angina
- 244  Medication use: beta-blocker, ACE inhibitor or ARB, statin, calcium-channel block
- 245  Reasons for missing opportunity for direct reperfusion: Patient delay, Financial issues,
- 246 Misdiagnosis, Others

### 247 **6.1.2 Medical history**

248 We will use frequency tables to evaluate the medical history data, showing how many subjects

249 have medical history findings (i.e., listed conditions of previous diagnoses, diseases, or

250 surgeries based on the CRF) that started before signing the informed consent and that are

251 considered relevant to the study.

### 252 **6.1.3 Protocol Deviations**

253 The frequency tables show the number of subjects with major protocol deviations overall,

254 grouped by type of deviation. The analysis will be based on ITT data. Types of major protocol

255 deviations include the following:

- 256 • Significant inclusion criteria not fulfilled
- 257 • Significant exclusion criteria fulfilled
- 258 • Failure to obtain informed consent before initiation of study procedures

- 259 • Prohibited medication use
- 260 • Failure to report SAE
- 261 • Failure to report outcome event
- 262 • Other safety

#### 263 **6.1.4 Prior and concomitant medications**

264 Frequency tables by type of medication will be provided for prior medications prior to the  
265 index events (for antiplatelets and anticoagulants) and prior to randomization (for all) and  
266 separately for concomitant medication continued after randomization, for visits 1, 3, 6 months,  
267 at EOT. Analyses will be by treatment group and overall based on ITT.

### 268 **6.2 Efficacy**

#### 269 **6.2.1 Primary efficacy variable**

270 The primary efficacy variable is the time from randomization to the first occurrence of any of  
271 the components of the composite outcome, including

- 272 • Cardiac death
- 273 • Myocardial infarction
- 274 • Rerevascularization
- 275 • Stroke

#### 276 **6.2.2 Primary safety variable**

277 The primary efficacy variable is the time from randomization to the first occurrence of ISTH  
278 bleeding events:

| Event Classification | Definition                                                                                                                                                                           |
|----------------------|--------------------------------------------------------------------------------------------------------------------------------------------------------------------------------------|
| ISTH major bleeding  | Hemoglobin drop of >2 g/dL, transfusion of >2 units packed red blood cells, symptomatic bleed in a critical area, or fatal bleeding                                                  |
| ISTH CRNM bleeding   | Requires or prolongs hospitalization or results in laboratory testing, imaging, compression, a procedure, interruption of the study medication, or a change in concomitant therapies |
| ISTH Minor           | Overt bleeding that does not meet criteria for CRNM or Major bleeding                                                                                                                |

279

### 280 **6.2.3 Secondary efficacy variable**

281 The secondary efficacy variables of this study are the time from randomization to first  
282 occurrence of the following:

- 283 • Cardiac-related rehospitalization
- 284 • All-cause death

### 285 **6.2.4 Subgroup variables**

286 For the comparison of primary efficacy and safety outcomes, the following subgroup analyses  
287 will be conducted based on baseline demographics:

- 288 • Age: <65; 60-75; >75 age (for publication: <65; ≥65 years) additionally <60; ≥60  
289 years
- 290 • Sex: male; female
- 291 • BMI: < 25; ≥ 25 to < 30; ≥ 30kg/m<sup>2</sup> (for publication: < 25; ≥ 25kg/m<sup>2</sup>)
- 292 • Weight: <70; 70-90; >90 kg (for publication: <50; 50-100; >100 kg)
- 293 • creatinine clearance: <50; 50-80; >80 mL/min (for publication: <50; ≥50 mL/min)
- 294 • Smoking: ever, former, current (for publication: yes or no)
- 295 • Hypertension: yes or no
- 296 • Dyslipidemia: yes or no
- 297 • Diabetes: yes or no
- 298 • Heart failure: yes or no
- 299 • Previous myocardial infarction
- 300 • Previous PCI or CABG
- 301 • Previous stroke
- 302 • Tobacco use: never, former, current
- 303 • Index diagnosis: STEMI, NSTEMI or unstable angina

304 The Steering Committee may propose a limited number of additional subgroup analyses.

### 305 **6.2.5 Sequential analyses**

306 Sequential noninferiority analyses were used for the primary endpoints. The coprimary  
307 endpoints were analyzed using a fixed-sequence testing procedure in order of (i) safety  
308 endpoint between the rivaroxaban-2.5 mg and enoxaparin groups, (ii) safety endpoint between  
309 the rivaroxaban-5 mg and enoxaparin groups, (iii) efficacy endpoint between the rivaroxaban-



310 5 mg and enoxaparin groups, and (iv) efficacy endpoint between the rivaroxaban-2.5 mg and  
311 enoxaparin groups. The noninferiority analysis was to be followed by a superiority analysis if  
312 noninferiority analysis was concluded.

### 313 **6.2.6 Analysis of the primary safety variable**

314 The primary analysis will include events adjudicated by the ICAC and will be based on the  
315 ITT analysis set using the ITT data scope.

316 To evaluate whether low-dose rivaroxaban is noninferior to enoxaparin in prolonging the time  
317 to a primary safety (PS) outcome event in patients with ACS, the following null hypothesis  
318 (H<sub>0</sub>) will be tested at the significance level of 0.025:

319 H<sub>0</sub>: PS<sub>1</sub>/PS<sub>2</sub> ≤ 1.24 versus

320 H<sub>1</sub>: PS<sub>1</sub>/PS<sub>2</sub> > 1.24

321 where PE<sub>1</sub> is the incidence of PS events for the low-dose rivaroxaban group and PS<sub>2</sub> is the  
322 incidence of PE outcome for the enoxaparin group. The ratio of 1.24 is the noninferior margin  
323 determined by the methods mentioned in section 4.6.

324

### 325 **6.2.7 Analysis of the primary efficacy variable**

326 ICAC events will be included in the primary analysis based on the ITT data scope and the ITT  
327 analysis set. To evaluate whether low-dose rivaroxaban is noninferior to enoxaparin in  
328 prolonging the time to a primary efficacy (PE) outcome event in patients with ACS, the  
329 following null hypothesis (H<sub>0</sub>) will be tested at the significance level of 0.025:

330  $H_0: PE1/PE2 \leq 1.185$  versus

331  $H_1: PE1/PE2 > 1.185$

332 where PE1 is the incidence of PE outcome for the low-dose rivaroxaban group and PE2 is the  
333 incidence of PE outcome for the enoxaparin group. The ratio of 1.185 is the noninferior  
334 margin determined by the methods mentioned in section 4.6.

### 335 **6.2.8 Analysis of the secondary efficacy variable**

336 The first secondary objective (to compare all-cause death and cardiac-related rehospitalization  
337 between the two groups) will be assessed via the following superiority hypotheses:

338  $H_0: SE1/SE2 \leq 1.0$  versus

339  $H_1: SE1/SE2 > 1.0$

340 where SE1 is the incidence of SE outcome for the low-dose rivaroxaban group and SE2 is the  
341 incidence of SE outcome for the enoxaparin group.

### 342 **6.2.9 Subgroup Analyses**

343 To determine whether the intervention effect is consistent across various subgroups, the  
344 estimate of the between-group treatment effect (with a nominal 95% CI) will be summarized  
345 for the primary endpoint.

### 346 **6.2.10 Sensitivity analyses**

347 To support the primary study results and to assess the robustness of the primary analysis,  
348 several sensitivity analyses will be conducted. For the sensitivity analyses, the per-protocol

349 population was used.

## 350 **7 DOCUMENT HISTORY AND CHANGES IN THE** 351 **PLANNED STATISTICAL ANALYSIS**

- 352 ● Approval of the SAP dated 22 November 2017
- 353 ● Amendment 1 of the SAP dated 6 March 2019
- 354 ● Amendment 2 of the SAP dated 10 October 2020

355

### 356 **7.1 Overview Changes to SAP**

357 The changes described in this section are editorial, administrative, and typographical  
358 corrections that do not affect the overall integrated SAP.

359 The following changes are introduced in SAP Version 2.0.

#### 360 **Modification 1:** Follow-up time for primary endpoints

361 The follow-up time for primary endpoints was changed from 6 months to 12 months on March  
362 2019 and changed back to 6 months on October 2020.

363 The follow-up time for the primary endpoints of the H-REPLACE study was set as 6 months  
364 in the NCT (<https://clinicaltrials.gov/ct2/show/NCT03363035>), which was registered on  
365 November 29, 2017. We submitted the rationale of the H-REPLACE study as a paper to a  
366 journal. We followed the reviewer's comments and agreed to change the follow-up time from

367 6 months to 12 months in the design paper. This change was made without authorization from  
368 the ethics committees of the Second Xiangya Hospital of Central South University. The ethics  
369 committees of the Second Xiangya Hospital of Central South University discussed this issue  
370 and refused the change in October 2020. The initial objective of this study was to explore  
371 whether rivaroxaban can be a substitution for enoxaparin during the acute phase of ACS. The  
372 use of a 12-month time-window in the noninferiority assessment of safety and efficacy of an  
373 antithrombotic trial regimen given for the first 4 days only may increase the false-positive rate  
374 ( $\alpha$  error) in the trial, as the addition of events that do not bear on the randomized treatment  
375 might increase the power of the trial. Therefore, we finally set the follow-up time for primary  
376 endpoints to 6 months with the approval of ethics committees. And we have also sent  
377 application letter to the journal and publishers for amendment of related contents in the  
378 published paper.

379 **Modification 2:** Sample size calculation

380 **Initial wrong methods:**

381 *The sample size was calculated on the website*

382 *<http://powerandsamplesize.com/Calculators/Compare-2-Proportions/2-Sample-Non->*

383 *Inferiority-or-Superioritypower.*

384 *According to the data from a meta-analysis[13], the event rate was 1.5% for 2.5 mg*

385 *rivaroxaban, 1.8% for 5 mg rivaroxaban, and 4.3% for enoxaparin, the beta value was set at*

386 *0.8, the alpha value was set at 0.025, the delta value was 1/10 (0.0043), and the obtained*

387 *sample size was 780 for 2.5 mg rivaroxaban and 1076 for 5 mg rivaroxaban.*

|                        |                                                   |                               |                        |                                                   |                               |
|------------------------|---------------------------------------------------|-------------------------------|------------------------|---------------------------------------------------|-------------------------------|
| Sample Size, \$n_{B}\$ | Power, \$1-\beta\$                                | Type I error rate, \$\alpha\$ | Sample Size, \$n_{B}\$ | Power, \$1-\beta\$                                | Type I error rate, \$\alpha\$ |
| 780                    | 0.8                                               | 2.5%                          | 1076                   | 0.8                                               | 2.5%                          |
| 0.015                  | Group 'A' Proportion, \$p_A\$                     |                               | 0.018                  | Group 'A' Proportion, \$p_A\$                     |                               |
| 0.043                  | Group 'B' Proportion, \$p_B\$                     |                               | 0.043                  | Group 'B' Proportion, \$p_B\$                     |                               |
| -0.0043                | Non-inferiority or Superiority Margin, \$\delta\$ |                               | -0.0043                | Non-inferiority or Superiority Margin, \$\delta\$ |                               |
| 1                      | Sampling Ratio, \$\kappa=n_A/n_B\$                |                               | 1                      | Sampling Ratio, \$\kappa=n_A/n_B\$                |                               |

388

389 *N=1076 was taken plus an assumed 5% loss-to-follow-up rate, N=1130 for each was*  
 390 *assumed, so 3390 was submitted to the clinicaltrials website.*

391 We found that the methods for sample size calculation was totally wrong as we calculated the  
 392 sample assuming the events rate of the two group was not equal during the period of the  
 393 research execution. With the noninferiority margins mentioned above, it would have required  
 394 sample sizes of 5655 and of 18161 patients in each group. Furthermore, data monitoring  
 395 committees found that the actual incidence of the primary endpoint was much lower than  
 396 expected. Thus the principal investigator and steering committees finally decided to change  
 397 the study to a feasibility trial with a sample size of approximately 2000 patients for the three  
 398 arms.

399

400

401 **8 REFERENCES**

402 [1] Amsterdam Ezra A, Wenger Nanette K, Brindis Ralph G, et al. 2014 AHA/ACC Guideline  
 403 for the Management of Patients with Non-ST-Elevation Acute Coronary Syndromes: a report

404 of the American College of Cardiology/American Heart Association Task Force on Practice  
405 Guidelines. J. Am. Coll. Cardiol, 2014, 64(24): e139-e228.

406 [2] Ibanez Borja, James Stefan, Agewall Stefan, et al. 2017 ESC Guidelines for the  
407 management of acute myocardial infarction in patients presenting with ST-segment elevation:  
408 The Task Force for the management of acute myocardial infarction in patients presenting with  
409 ST-segment elevation of the European Society of Cardiology (ESC). Eur. Heart J., 2017.  
410 doi:10.1093/eurheartj/ehx393

411 [2] Amsterdam Ezra A, Wenger Nanette K, Brindis Ralph G, et al. 2014 AHA/ACC Guideline  
412 for the Management of Patients with Non-ST-Elevation Acute Coronary Syndromes: a report  
413 of the American College of Cardiology/American Heart Association Task Force on Practice  
414 Guidelines. J. Am. Coll. Cardiol., 2014, 64(24): e139-e228.

415 [3] Heidbuchel Hein, Verhamme Peter, Alings Marco, et al. Updated European Heart Rhythm  
416 Association practical guide on the use of non-vitamin-K antagonist anticoagulants in patients  
417 with non-valvular atrial fibrillation: Executive summary. Eur. Heart J., 2017, 38(27): 2137-  
418 2149.

419 [4] FDA: <http://www.drugfuture.com/fda/drugview/020164>

420 [5] FDA: <http://www.drugfuture.com/fda/drugview/022406>

421 [6] Kakkar Ajay K, Brenner Benjamin, Dahl Ola E, et al. Extended duration rivaroxaban  
422 versus short-term enoxaparin for the prevention of venous thromboembolism after total hip  
423 arthroplasty: a double-blind, randomised controlled trial. Lancet, 2008, 372(9632): 31-39.

- 424 [7] Prins Martin H, Bamber Luke, Cano Stefan J, et al. Patient-reported treatment satisfaction  
425 with oral rivaroxaban versus standard therapy in the treatment of pulmonary embolism; results  
426 from the EINSTEIN PE trial. *Thromb. Res*, 2015, 135(2): 281-288.
- 427 [8] Turpie Alexander G G, Lassen Michael R, Davidson Bruce L, et al. Rivaroxaban versus  
428 enoxaparin for thromboprophylaxis after total knee arthroplasty (RECORD4): a randomised  
429 trial. *Lancet*, 2009, 373(9676): 1673-1680.
- 430 [9] Beyer-Westendorf Jan, Lensing Anthonie W A, Arya Roopen, et al. Choosing wisely: The  
431 impact of patient selection on efficacy and safety outcomes in the EINSTEIN-DVT/PE and  
432 AMPLIFY trials. *Thromb Res*, 2017, 149: 29-37.
- 433 [10] Geller Bram J, Mega Jessica L, Morrow David A, et al. Autoantibodies to  
434 phosphorylcholine and cardiovascular outcomes in patients with acute coronary syndromes in  
435 the ATLAS ACS-TIMI 46 trial. *J. Thromb. Thrombolysis*, 2014, 37(3): 310-316.
- 436 [11] Spinler Sarah A, Inverso Stephanie M, Cohen Marc, et al. Safety and efficacy of  
437 unfractionated heparin versus enoxaparin in patients who are obese and patients with severe  
438 renal impairment: analysis from the ESSENCE and TIMI 11B studies. *Am. Heart J*, 2003,  
439 146(1): 33-41.
- 440 [12] Dubois M F, Hbert R. Imputation of Missing Dates of Death or Institutionalization for  
441 Time-to-Event Analyses in the Canadian Study of Health and Aging. *International*  
442 *Psychogeriatrics*, 2001, 13 supp 1(S1):91-97.
- 443 [13] Eikelboom JW, Anand SS, Malmberg K, Weitz JI, Ginsberg JS, Yusuf S. Unfractionated  
444 heparin and low-molecular-weight heparin in acute coronary syndrome without ST elevation:

445 a meta-analysis. *Lancet*. 2000;355(9219):1936-1942.

446 [14] Fifth Organization to Assess Strategies in Acute Ischemic Syndromes Investigators,  
447 Yusuf Salim, Mehta Shamir R, et al. Comparison of fondaparinux and enoxaparin in acute  
448 coronary syndromes. *N Engl J Med*. 2006;354(14): 1464-1476.

449 [15] US Department of Health and Human Services, US Food and Drug Administration,  
450 Center for Biologics Evaluation and Research (CBER). Guidance for industry non-inferiority  
451 clinical trials. Published March 2010. Accessed April  
452 8,2022.[www.fda.gov/downloads/drugs/guidancecomplianceregulatoryinformation/guidances/  
453 ucm202140.pdf](http://www.fda.gov/downloads/drugs/guidancecomplianceregulatoryinformation/guidances/ucm202140.pdf).

454 [16] U.S. Department of Health and Human Services, Food and Drug Administration, Center  
455 for Drug Evaluation and Research (CDER). Guidance for industry: statistical Approaches to  
456 Establishing Bioequivalence. Published April 29, 2020. Accessed April 8, 2022.  
457 [http://www.fda.gov/downloads/drugs/guidancecomplianceregulatoryinformation/guidances/uc  
458 m070244.pdf](http://www.fda.gov/downloads/drugs/guidancecomplianceregulatoryinformation/guidances/ucm070244.pdf).
