# Supplementary material for: Effect of Rivaroxaban vs Enoxaparin on Major Cardiac Adverse Events and Bleeding Risk in the Acute Phase of Acute Coronary Syndrome: The H-REPLACE Randomized Equivalence and Noninferiority Trial
Source: PubMed Central journal article supplement (PMC9918885; doi:10.1001/jamanetworkopen.2022.55709), 2023-02-10
Supplement: jamanetwopen-e2255709-s003.pdf [file jamanetwopen-e2255709-s003.pdf]

\*First name, last name, and suffix (if applicable) are required and will appear in PubMed.

| <b>*Group Name(s): the H-REPLACE Investigators</b> |                   |                              |                  |                                                         |                                          |                                                         |                                                                                            |
|----------------------------------------------------|-------------------|------------------------------|------------------|---------------------------------------------------------|------------------------------------------|---------------------------------------------------------|--------------------------------------------------------------------------------------------|
| <b>*First Name and Middle Initial(s)</b>           | <b>*Last Name</b> | <b>*Suffix (eg, Jr, III)</b> | Academic Degrees | Institution                                             | Location (city, state/province, country) | Role or Contribution, eg, chair, principal investigator | Group (if more than 1 Group listed in the byline) and/or Subgroup (eg, Steering Committee) |
| Xinqun                                             | Hu                |                              | MD               | The Second Xiangya Hospital of Central South University | Changsha, Hunan, China                   | Screening and enrollment                                | the H-REPLACE Investigators                                                                |
| Zhenfei                                            | Fang              |                              | MD               | The Second Xiangya Hospital of Central South University | Changsha, Hunan, China                   | Screening and enrollment                                | the H-REPLACE Investigators                                                                |
| Liang                                              | Tang              |                              | MD               | The Second Xiangya Hospital of Central South University | Changsha, Hunan, China                   | Screening and enrollment                                | the H-REPLACE Investigators                                                                |
| Xuping                                             | Li                |                              | MD               | The Second Xiangya Hospital of Central South University | Changsha, Hunan, China                   | Screening and enrollment                                | the H-REPLACE Investigators                                                                |
| Zhaowei                                            | Zhu               |                              | MD               | The Second Xiangya Hospital of Central South University | Changsha, Hunan, China                   | Screening and enrollment                                | the H-REPLACE Investigators                                                                |
| Shi                                                | Tai               |                              | MD               | The Second Xiangya Hospital of Central South University | Changsha, Hunan, China                   | Screening and enrollment                                | the H-REPLACE Investigators                                                                |
| Tao                                                | Tu                |                              | MD               | The Second Xiangya Hospital of Central South University | Changsha, Hunan, China                   | Screening and enrollment                                | the H-REPLACE Investigators                                                                |
| Hui                                                | Yang              |                              | MD               | The Second Xiangya Hospital of Central South University | Changsha, Hunan, China                   | Screening and enrollment                                | the H-REPLACE Investigators                                                                |
| Yuhu                                               | He                |                              | MD               | The Second Xiangya Hospital of Central South University | Changsha, Hunan, China                   | Screening and enrollment                                | the H-REPLACE Investigators                                                                |
| Mingxian                                           | Chen              |                              | MD               | The Second Xiangya Hospital of Central South University | Changsha, Hunan, China                   | Screening and enrollment                                | the H-REPLACE Investigators                                                                |
| Daoquan                                            | Peng              |                              | MD               | The Second Xiangya Hospital of Central South University | Changsha, Hunan, China                   | Screening and enrollment                                | the H-REPLACE Investigators                                                                |
| Yanshu                                             | Zhao              |                              | MD               | The Second Xiangya Hospital of Central South University | Changsha, Hunan, China                   | Screening and enrollment                                | the H-REPLACE Investigators                                                                |
| Danyan                                             | Xu                |                              | MD               | The Second Xiangya Hospital of Central South University | Changsha, Hunan, China                   | Screening and enrollment                                | the H-REPLACE Investigators                                                                |
| Jianjun                                            | Tang              |                              | MD               | The Second Xiangya Hospital of Central South University | Changsha, Hunan, China                   | Screening and enrollment                                | the H-REPLACE Investigators                                                                |
| Jiang                                              | Li                |                              | MD               | The Second Xiangya Hospital of Central South University | Changsha, Hunan, China                   | Screening and enrollment                                | the H-REPLACE Investigators                                                                |

## Supplemental Online Content: Nonauthor Collaborators

\*First name, last name, and suffix (if applicable) are required and will appear in PubMed.

| *First Name and Middle Initial(s) | *Last Name | *Suffix (eg, Jr, III) | Academic Degrees | Institution                                                                                  | Location (city, state/province, country) | Role or Contribution, eg, chair, principal investigator | Group (if more than 1 Group listed in the byline) and/or Subgroup (eg, Steering Committee) |
|-----------------------------------|------------|-----------------------|------------------|----------------------------------------------------------------------------------------------|------------------------------------------|---------------------------------------------------------|--------------------------------------------------------------------------------------------|
| Yaqin                             | Chen       |                       | MD               | The Second Xiangya Hospital of Central South University                                      | Changsha, Hunan, China                   | Screening and enrollment                                | the H-REPLACE Investigators                                                                |
| Yi                                | Li         |                       | MM               | The Second Xiangya Hospital of Central South University                                      | Changsha, Hunan, China                   | data collection                                         | the H-REPLACE Investigators                                                                |
| Xiaolan                           | Luo        |                       | MD               | The Second Xiangya Hospital of Central South University                                      | Changsha, Hunan, China                   | Screening and enrollment                                | the H-REPLACE Investigators                                                                |
| Yong                              | Huang      |                       | MM               | Xiangxiang People's Hospital                                                                 | Xiangtan, Hunan, China                   | data collection                                         | the H-REPLACE Investigators                                                                |
| Jianqiang                         | Xiang      |                       | MM               | Xiangxiang People's Hospital                                                                 | Xiangtan, Hunan, China                   | Screening and enrollment                                | the H-REPLACE Investigators                                                                |
| Qinglin                           | Guan       |                       | MM               | Xiangxiang People's Hospital                                                                 | Xiangtan, Hunan, China                   | Screening and enrollment                                | the H-REPLACE Investigators                                                                |
| Xinyang                           | Li         |                       | MM               | Xiangxiang People's Hospital                                                                 | Xiangtan, Hunan, China                   | Screening and enrollment                                | the H-REPLACE Investigators                                                                |
| Xiaojun                           | Yi         |                       | MM               | Xiangxiang People's Hospital                                                                 | Xiangtan, Hunan, China                   | Screening and enrollment                                | the H-REPLACE Investigators                                                                |
| Fang                              | Tan        |                       | MM               | Xiangxiang People's Hospital                                                                 | Xiangtan, Hunan, China                   | Screening and enrollment                                | the H-REPLACE Investigators                                                                |
| Yan                               | Liu        |                       | MM               | Xiangxiang People's Hospital                                                                 | Xiangtan, Hunan, China                   | Screening and enrollment                                | the H-REPLACE Investigators                                                                |
| Jiang                             | Pan        |                       | MM               | Xiangxiang People's Hospital                                                                 | Xiangtan, Hunan, China                   | Screening and enrollment                                | the H-REPLACE Investigators                                                                |
| Jianqiang                         | Peng       |                       | MD               | Hunan Provincial People's Hospital, The First Affiliated Hospital of Hunan Normal University | Changsha, Hunan, China                   | Screening and enrollment                                | the H-REPLACE Investigators                                                                |
| Sulan                             | Yan        |                       | MM               | Hunan Provincial People's Hospital, The First Affiliated Hospital of Hunan Normal University | Changsha, Hunan, China                   | Screening and enrollment                                | the H-REPLACE Investigators                                                                |
| Zhengyu                           | Liu        |                       | MM               | Hunan Provincial People's Hospital, The First Affiliated Hospital of Hunan Normal University | Changsha, Hunan, China                   | Screening and enrollment                                | the H-REPLACE Investigators                                                                |

## Supplemental Online Content: Nonauthor Collaborators

\*First name, last name, and suffix (if applicable) are required and will appear in PubMed.

| *First Name and Middle Initial(s) | *Last Name | *Suffix (eg, Jr, III) | Academic Degrees | Institution                                                                                  | Location (city, state/province, country) | Role or Contribution, eg, chair, principal investigator | Group (if more than 1 Group listed in the byline) and/or Subgroup (eg, Steering Committee) |
|-----------------------------------|------------|-----------------------|------------------|----------------------------------------------------------------------------------------------|------------------------------------------|---------------------------------------------------------|--------------------------------------------------------------------------------------------|
| Bo                                | Cui        |                       | MM               | Hunan Provincial People's Hospital, The First Affiliated Hospital of Hunan Normal University | Changsha, Hunan, China                   | Screening and enrollment                                | the H-REPLACE Investigators                                                                |
| Peng                              | Wang       |                       | MM               | Hunan Provincial People's Hospital, The First Affiliated Hospital of Hunan Normal University | Changsha, Hunan, China                   | Screening and enrollment                                | the H-REPLACE Investigators                                                                |
| Yi                                | Tang       |                       | MD               | Hunan Provincial People's Hospital, The First Affiliated Hospital of Hunan Normal University | Changsha, Hunan, China                   | Screening and enrollment                                | the H-REPLACE Investigators                                                                |
| Juan                              | Wen        |                       | MM               | The Third Xiangya Hospital of Central South University Changsha                              | Changsha, Hunan, China                   | data collection                                         | the H-REPLACE Investigators                                                                |
| Hong                              | Liu        |                       | MM               | The Third Xiangya Hospital of Central South University Changsha                              | Changsha, Hunan, China                   | Screening and enrollment                                | the H-REPLACE Investigators                                                                |
| Chunyan                           | Weng       |                       | MM               | The Third Xiangya Hospital of Central South University Changsha                              | Changsha, Hunan, China                   | Screening and enrollment                                | the H-REPLACE Investigators                                                                |
| Xi                                | Wu         |                       | MM               | The Third Xiangya Hospital of Central South University Changsha                              | Changsha, Hunan, China                   | Screening and enrollment                                | the H-REPLACE Investigators                                                                |
| Jingjia                           | Yu         |                       | MM               | The Third Xiangya Hospital of Central South University Changsha                              | Changsha, Hunan, China                   | Screening and enrollment                                | the H-REPLACE Investigators                                                                |
| Qiong                             | Yang       |                       | MM               | The Third Xiangya Hospital of Central South University Changsha                              | Changsha, Hunan, China                   | Screening and enrollment                                | the H-REPLACE Investigators                                                                |
| Liping                            | Peng       |                       | MM               | The Third Xiangya Hospital of Central South University Changsha                              | Changsha, Hunan, China                   | Screening and enrollment                                | the H-REPLACE Investigators                                                                |

## Supplemental Online Content: Nonauthor Collaborators

\*First name, last name, and suffix (if applicable) are required and will appear in PubMed.

| *First Name and Middle Initial(s) | *Last Name | *Suffix (eg, Jr, III) | Academic Degrees | Institution                                                     | Location (city, state/province, country) | Role or Contribution, eg, chair, principal investigator | Group (if more than 1 Group listed in the byline) and/or Subgroup (eg, Steering Committee) |
|-----------------------------------|------------|-----------------------|------------------|-----------------------------------------------------------------|------------------------------------------|---------------------------------------------------------|--------------------------------------------------------------------------------------------|
| Anying                            | Li         |                       | MM               | The Third Xiangya Hospital of Central South University Changsha | Changsha, Hunan, China                   | Screening and enrollment                                | the H-REPLACE Investigators                                                                |
| Zhihui                            | Zhang      |                       |                  | The Third Xiangya Hospital of Central South University Changsha | Changsha, Hunan, China                   | Screening and enrollment                                | the H-REPLACE Investigators                                                                |
| Xiaowei                           | Zhou       |                       | MM               | The Third Xiangya Hospital of Central South University Changsha | Changsha, Hunan, China                   | Screening and enrollment                                | the H-REPLACE Investigators                                                                |
| Huaqing                           | Tan        |                       | MD               | The First People's Hospital of Loudi                            | Loudi, Hunan, China                      | Sub-investigator                                        | the H-REPLACE Investigators                                                                |
| Jie                               | Chen       |                       | MM               | The First People's Hospital of Loudi                            | Loudi, Hunan, China                      | data collection                                         | the H-REPLACE Investigators                                                                |
| Zhiyuan                           | Yang       |                       | MM               | The First People's Hospital of Loudi                            | Loudi, Hunan, China                      | Screening and enrollment                                | the H-REPLACE Investigators                                                                |
| Zhizhong                          | Liang      |                       | MM               | The First People's Hospital of Loudi                            | Loudi, Hunan, China                      | Screening and enrollment                                | the H-REPLACE Investigators                                                                |
| Xiangyu                           | Tang       |                       | MM               | The First People's Hospital of Loudi                            | Loudi, Hunan, China                      | Screening and enrollment                                | the H-REPLACE Investigators                                                                |
| Sha                               | Chen       |                       | MM               | The First People's Hospital of Loudi                            | Loudi, Hunan, China                      | Screening and enrollment                                | the H-REPLACE Investigators                                                                |
| Lan                               | Zeng       |                       | MM               | The First People's Hospital of Loudi                            | Loudi, Hunan, China                      | Screening and enrollment                                | the H-REPLACE Investigators                                                                |
| Yingtao                           | Wu         |                       | MM               | The First People's Hospital of Loudi                            | Loudi, Hunan, China                      | Screening and enrollment                                | the H-REPLACE Investigators                                                                |
| Guangyao                          | Chen       |                       | MM               | The First People's Hospital of Loudi                            | Loudi, Hunan, China                      | Screening and enrollment                                | the H-REPLACE Investigators                                                                |
| Dihua                             | Yan        |                       | MM               | The First People's Hospital of Loudi                            | Loudi, Hunan, China                      | Screening and enrollment                                | the H-REPLACE Investigators                                                                |
| Lianghui                          | Zhou       |                       | MM               | The First People's Hospital of Loudi                            | Loudi, Hunan, China                      | Screening and enrollment                                | the H-REPLACE Investigators                                                                |
| Siqin                             | Yuan       |                       | MM               | The First People's Hospital of Loudi                            | Loudi, Hunan, China                      | Screening and enrollment                                | the H-REPLACE Investigators                                                                |

## Supplemental Online Content: Nonauthor Collaborators

\*First name, last name, and suffix (if applicable) are required and will appear in PubMed.

| *First Name and Middle Initial(s) | *Last Name | *Suffix (eg, Jr, III) | Academic Degrees | Institution                                                   | Location (city, state/province, country) | Role or Contribution, eg, chair, principal investigator | Group (if more than 1 Group listed in the byline) and/or Subgroup (eg, Steering Committee) |
|-----------------------------------|------------|-----------------------|------------------|---------------------------------------------------------------|------------------------------------------|---------------------------------------------------------|--------------------------------------------------------------------------------------------|
| Rong                              | Wu         |                       | MM               | The First People's Hospital of Loudi                          | Loudi, Hunan, China                      | Screening and enrollment                                | the H-REPLACE Investigators                                                                |
| Pei                               | Zhou       |                       | MM               | The First People's Hospital of Loudi                          | Loudi, Hunan, China                      | Screening and enrollment                                | the H-REPLACE Investigators                                                                |
| Yuzhen                            | Fu         |                       | MM               | The First People's Hospital of Loudi                          | Loudi, Hunan, China                      | Screening and enrollment                                | the H-REPLACE Investigators                                                                |
| Youliang                          | Huang      |                       | MD               | The First Affiliated Hospital of Hunan University of Medicine | Huaihua, Hunan,China                     | Sub-investigator                                        | the H-REPLACE Investigators                                                                |
| Wei                               | Tang       |                       | MD               | The First Affiliated Hospital of Hunan University of Medicine | Huaihua, Hunan,China                     | data collection                                         | the H-REPLACE Investigators                                                                |
| Yang                              | Nie        |                       | MD               | The First Affiliated Hospital of Hunan University of Medicine | Huaihua, Hunan,China                     | Screening and enrollment                                | the H-REPLACE Investigators                                                                |
| Hongju                            | Xiang      |                       | MM               | The First Affiliated Hospital of Jishou University            | Jishou, Hunan, China                     | Screening and enrollment                                | the H-REPLACE Investigators                                                                |
| Wei                               | Chen       |                       | MM               | The First Affiliated Hospital of Jishou University            | Jishou, Hunan, China                     | Screening and enrollment                                | the H-REPLACE Investigators                                                                |
| Zhiyong                           | Yang       |                       | MM               | The First Affiliated Hospital of Jishou University            | Jishou, Hunan, China                     | Screening and enrollment                                | the H-REPLACE Investigators                                                                |
| Yue                               | Wu         |                       | MM               | The First Affiliated Hospital of Jishou University            | Jishou, Hunan, China                     | Screening and enrollment                                | the H-REPLACE Investigators                                                                |
| Haishui                           | Deng       |                       | MM               | The First Affiliated Hospital of Jishou University            | Jishou, Hunan, China                     | Screening and enrollment                                | the H-REPLACE Investigators                                                                |
| Ming                              | Lei        |                       | MM               | The First Affiliated Hospital of Jishou University            | Jishou, Hunan, China                     | Screening and enrollment                                | the H-REPLACE Investigators                                                                |
| Bailing                           | Zhang      |                       | MM               | The First Affiliated Hospital of Jishou University            | Jishou, Hunan, China                     | Screening and enrollment                                | the H-REPLACE Investigators                                                                |
| Xing                              | Xiang      |                       | MM               | The First Affiliated Hospital of Jishou University            | Jishou, Hunan, China                     | Screening and enrollment                                | the H-REPLACE Investigators                                                                |
| Bingqing                          | Xue        |                       | MM               | The First Affiliated Hospital of Jishou University            | Jishou, Hunan, China                     | Screening and enrollment                                | the H-REPLACE Investigators                                                                |
| Liping                            | Xiong      |                       | MM               | The First Affiliated Hospital of Jishou University            | Jishou, Hunan, China                     | Screening and enrollment                                | the H-REPLACE Investigators                                                                |

## Supplemental Online Content: Nonauthor Collaborators

\*First name, last name, and suffix (if applicable) are required and will appear in PubMed.

| *First Name and Middle Initial(s) | *Last Name | *Suffix (eg, Jr, III) | Academic Degrees | Institution                                        | Location (city, state/province, country) | Role or Contribution, eg, chair, principal investigator | Group (if more than 1 Group listed in the byline) and/or Subgroup (eg, Steering Committee) |
|-----------------------------------|------------|-----------------------|------------------|----------------------------------------------------|------------------------------------------|---------------------------------------------------------|--------------------------------------------------------------------------------------------|
| Xiping                            | Xu         |                       | MD               | The First People's Hospital of Yueyang             | Yueyang, Hunan, China                    | Sub-investigator                                        | the H-REPLACE Investigators                                                                |
| Xiaojian                          | Feng       |                       | MM               | The First People's Hospital of Yueyang             | Yueyang, Hunan, China                    | data collection                                         | the H-REPLACE Investigators                                                                |
| Jianhua                           | Zhao       |                       | MM               | The First People's Hospital of Yueyang             | Yueyang, Hunan, China                    | Screening and enrollment                                | the H-REPLACE Investigators                                                                |
| Yonghua                           | Lu         |                       | MM               | The First People's Hospital of Yueyang             | Yueyang, Hunan, China                    | Screening and enrollment                                | the H-REPLACE Investigators                                                                |
| Zhengzai                          | Li         |                       | MM               | The First People's Hospital of Yueyang             | Yueyang, Hunan, China                    | Screening and enrollment                                | the H-REPLACE Investigators                                                                |
| Bo                                | Zhou       |                       | MM               | The First People's Hospital of Yueyang             | Yueyang, Hunan, China                    | Screening and enrollment                                | the H-REPLACE Investigators                                                                |
| Cheng                             | Li         |                       | MM               | The First People's Hospital of Yueyang             | Yueyang, Hunan, China                    | Screening and enrollment                                | the H-REPLACE Investigators                                                                |
| Zibin                             | Deng       |                       | MM               | The First People's Hospital of Yueyang             | Yueyang, Hunan, China                    | Screening and enrollment                                | the H-REPLACE Investigators                                                                |
| Hongda                            | Feng       |                       | MM               | The First People's Hospital of Yueyang             | Yueyang, Hunan, China                    | Screening and enrollment                                | the H-REPLACE Investigators                                                                |
| Xibin                             | Zhang      |                       | MM               | The First People's Hospital of Yueyang             | Yueyang, Hunan, China                    | Screening and enrollment                                | the H-REPLACE Investigators                                                                |
| Guoli                             | Wang       |                       | MM               | The First People's Hospital of Yueyang             | Yueyang, Hunan, China                    | Screening and enrollment                                | the H-REPLACE Investigators                                                                |
| Zhi                               | Chen       |                       | MM               | The First People's Hospital of Yueyang             | Yueyang, Hunan, China                    | Screening and enrollment                                | the H-REPLACE Investigators                                                                |
| Wenxuan                           | Zeng       |                       | MM               | The First People's Hospital of Yueyang             | Yueyang, Hunan, China                    | Screening and enrollment                                | the H-REPLACE Investigators                                                                |
| Di                                | Shen       |                       | MM               | The First People's Hospital of Yueyang             | Yueyang, Hunan, China                    | Screening and enrollment                                | the H-REPLACE Investigators                                                                |
| Xiangyong                         | Hu         |                       | MM               | The First Affiliated Hospital of Jishou University | Jishou, Hunan, China                     | Screening and enrollment                                | the H-REPLACE Investigators                                                                |
| Xuemei                            | Chen       |                       | MM               | The First People's Hospital of Changde City        | Changde, Hunan, China                    | data collection                                         | the H-REPLACE Investigators                                                                |

## Supplemental Online Content: Nonauthor Collaborators

\*First name, last name, and suffix (if applicable) are required and will appear in PubMed.

| *First Name and Middle Initial(s) | *Last Name | *Suffix (eg, Jr, III) | Academic Degrees | Institution                                 | Location (city, state/province, country) | Role or Contribution, eg, chair, principal investigator | Group (if more than 1 Group listed in the byline) and/or Subgroup (eg, Steering Committee) |
|-----------------------------------|------------|-----------------------|------------------|---------------------------------------------|------------------------------------------|---------------------------------------------------------|--------------------------------------------------------------------------------------------|
| Zuoan                             | Qin        |                       | MM               | The First People's Hospital of Changde City | Changde, Hunan, China                    | Screening and enrollment                                | the H-REPLACE Investigators                                                                |
| Sulan                             | Huang      |                       | MM               | The First People's Hospital of Changde City | Changde, Hunan, China                    | Screening and enrollment                                | the H-REPLACE Investigators                                                                |
| Ning                              | Guo        |                       | MM               | The First People's Hospital of Changde City | Changde, Hunan, China                    | Screening and enrollment                                | the H-REPLACE Investigators                                                                |
| Zhixiang                          | Zhang      |                       | MM               | The First People's Hospital of Changde City | Changde, Hunan, China                    | Screening and enrollment                                | the H-REPLACE Investigators                                                                |
| Kun                               | Chen       |                       | MM               | The First People's Hospital of Changde City | Changde, Hunan, China                    | Screening and enrollment                                | the H-REPLACE Investigators                                                                |
| Bingxing                          | Gong       |                       | MM               | The First People's Hospital of Changde City | Changde, Hunan, China                    | Screening and enrollment                                | the H-REPLACE Investigators                                                                |
| Min                               | Yin        |                       | MM               | The First People's Hospital of Changde City | Changde, Hunan, China                    | Screening and enrollment                                | the H-REPLACE Investigators                                                                |
| Tao                               | Qin        |                       | MM               | The First People's Hospital of Changde City | Changde, Hunan, China                    | Screening and enrollment                                | the H-REPLACE Investigators                                                                |
| Tao                               | Hu         |                       | MM               | The First People's Hospital of Changde City | Changde, Hunan, China                    | Screening and enrollment                                | the H-REPLACE Investigators                                                                |
| Jiangbiao                         | Yu         |                       | MM               | The First People's Hospital of Changde City | Changde, Hunan, China                    | Screening and enrollment                                | the H-REPLACE Investigators                                                                |
| Ting                              | Zhang      |                       | MM               | The First People's Hospital of Changde City | Changde, Hunan, China                    | Screening and enrollment                                | the H-REPLACE Investigators                                                                |
| Xingcheng                         | Guo        |                       | MM               | The First People's Hospital of Changde City | Changde, Hunan, China                    | Screening and enrollment                                | the H-REPLACE Investigators                                                                |
| Hui                               | Peng       |                       | MM               | The First People's Hospital of Changde City | Changde, Hunan, China                    | Screening and enrollment                                | the H-REPLACE Investigators                                                                |
| Minming                           | Yin        |                       | MM               | The First People's Hospital of Changde City | Changde, Hunan, China                    | Screening and enrollment                                | the H-REPLACE Investigators                                                                |
| Huaineng                          | Zhou       |                       | MM               | The First People's Hospital of Changde City | Changde, Hunan, China                    | Screening and enrollment                                | the H-REPLACE Investigators                                                                |
| Li                                | Luo        |                       | MM               | The First People's Hospital of Changde City | Changde, Hunan, China                    | Screening and enrollment                                | the H-REPLACE Investigators                                                                |
| Xiaoxia                           | Xiao       |                       | MM               | The Third Hospital of Changsha              | Changsha, Hunan, China                   | data collection                                         | the H-REPLACE Investigators                                                                |

## Supplemental Online Content: Nonauthor Collaborators

\*First name, last name, and suffix (if applicable) are required and will appear in PubMed.

| *First Name and Middle Initial(s) | *Last Name | *Suffix (eg, Jr, III) | Academic Degrees | Institution                               | Location (city, state/province, country) | Role or Contribution, eg, chair, principal investigator | Group (if more than 1 Group listed in the byline) and/or Subgroup (eg, Steering Committee) |
|-----------------------------------|------------|-----------------------|------------------|-------------------------------------------|------------------------------------------|---------------------------------------------------------|--------------------------------------------------------------------------------------------|
| Yong                              | Quan       |                       | MM               | The Third Hospital of Changsha            | Changsha, Hunan, China                   | Screening and enrollment                                | the H-REPLACE Investigators                                                                |
| Weifen                            | Liang      |                       | MM               | The Third Hospital of Changsha            | Changsha, Hunan, China                   | Screening and enrollment                                | the H-REPLACE Investigators                                                                |
| Yang                              | Wu         |                       | MM               | The Third Hospital of Changsha            | Changsha, Hunan, China                   | Screening and enrollment                                | the H-REPLACE Investigators                                                                |
| Hang                              | Chen       |                       | MM               | The Third Hospital of Changsha            | Changsha, Hunan, China                   | Screening and enrollment                                | the H-REPLACE Investigators                                                                |
| Wei                               | Shi        |                       | MM               | The Third Hospital of Changsha            | Changsha, Hunan, China                   | Screening and enrollment                                | the H-REPLACE Investigators                                                                |
| Aiyang                            | Liu        |                       | MM               | The Third Hospital of Changsha            | Changsha, Hunan, China                   | Screening and enrollment                                | the H-REPLACE Investigators                                                                |
| Yijian                            | Liu        |                       | MM               | The Third Hospital of Changsha            | Changsha, Hunan, China                   | Screening and enrollment                                | the H-REPLACE Investigators                                                                |
| Guiyun                            | Ruan       |                       | MM               | The Third Hospital of Changsha            | Changsha, Hunan, China                   | Screening and enrollment                                | the H-REPLACE Investigators                                                                |
| Peng                              | Liu        |                       | MM               | The Central Hospital of Shaoyang Shaoyang | Shaoyang, Hunan, China                   | Screening and enrollment                                | the H-REPLACE Investigators                                                                |
| Canxiang                          | Luo        |                       | MM               | The Central Hospital of Shaoyang Shaoyang | Shaoyang, Hunan, China                   | Screening and enrollment                                | the H-REPLACE Investigators                                                                |
| Lin                               | He         |                       | MM               | The Central Hospital of Shaoyang Shaoyang | Shaoyang, Hunan, China                   | Screening and enrollment                                | the H-REPLACE Investigators                                                                |
| Li                                | Deng       |                       | MM               | The Central Hospital of Shaoyang Shaoyang | Shaoyang, Hunan, China                   | Screening and enrollment                                | the H-REPLACE Investigators                                                                |
| Shayan                            | Sun        |                       | MM               | The Central Hospital of Shaoyang Shaoyang | Shaoyang, Hunan, China                   | Screening and enrollment                                | the H-REPLACE Investigators                                                                |
| Shuo                              | Yang       |                       | MM               | The Central Hospital of Shaoyang Shaoyang | Shaoyang, Hunan, China                   | Screening and enrollment                                | the H-REPLACE Investigators                                                                |
| Sha                               | Wang       |                       | MM               | The Central Hospital of Shaoyang Shaoyang | Shaoyang, Hunan, China                   | Screening and enrollment                                | the H-REPLACE Investigators                                                                |
| Songbing                          | Long       |                       | MM               | The Central Hospital of Shaoyang Shaoyang | Shaoyang, Hunan, China                   | Screening and enrollment                                | the H-REPLACE Investigators                                                                |



## Supplemental Online Content: Nonauthor Collaborators

\*First name, last name, and suffix (if applicable) are required and will appear in PubMed.

| *First Name and Middle Initial(s) | *Last Name | *Suffix (eg, Jr, III) | Academic Degrees | Institution                                                 | Location (city, state/province, country) | Role or Contribution, eg, chair, principal investigator | Group (if more than 1 Group listed in the byline) and/or Subgroup (eg, Steering Committee) |
|-----------------------------------|------------|-----------------------|------------------|-------------------------------------------------------------|------------------------------------------|---------------------------------------------------------|--------------------------------------------------------------------------------------------|
| Yizhu                             | Duan       |                       | MM               | The Central Hospital of Shaoyang Shaoyang                   | Shaoyang, Hunan, China                   | Screening and enrollment                                | the H-REPLACE Investigators                                                                |
| Jin                               | Luo        |                       | MM               | The Central Hospital of Shaoyang Shaoyang                   | Shaoyang, Hunan, China                   | Screening and enrollment                                | the H-REPLACE Investigators                                                                |
| Zhengjie                          | Xue        |                       | MM               | The Central Hospital of Shaoyang Shaoyang                   | Shaoyang, Hunan, China                   | Screening and enrollment                                | the H-REPLACE Investigators                                                                |
| Luzhu                             | Chen       |                       | MM               | The Central Hospital of Shaoyang Shaoyang                   | Shaoyang, Hunan, China                   | Screening and enrollment                                | the H-REPLACE Investigators                                                                |
| Caiyan                            | Guo        |                       | MM               | The Central Hospital of Shaoyang Shaoyang                   | Shaoyang, Hunan, China                   | Screening and enrollment                                | the H-REPLACE Investigators                                                                |
| Yongjun                           | Yin        |                       | MM               | The Central Hospital of Shaoyang Shaoyang                   | Shaoyang, Hunan, China                   | Screening and enrollment                                | the H-REPLACE Investigators                                                                |
| Yanbo                             | Wang       |                       | MM               | The Central Hospital of Shaoyang Shaoyang                   | Shaoyang, Hunan, China                   | Screening and enrollment                                | the H-REPLACE Investigators                                                                |
| Fan                               | Ouyang     |                       | MD               | Zhuzhou Central Hospital                                    | Zhuzhou, Hunan, China                    | Sub-investigator                                        | the H-REPLACE Investigators                                                                |
| Shuhong                           | Guo        |                       | MD               | Zhuzhou Central Hospital                                    | Zhuzhou, Hunan, China                    | Screening and enrollment                                | the H-REPLACE Investigators                                                                |
| Weiqing                           | Liu        |                       | MM               | Zhuzhou Central Hospital                                    | Zhuzhou, Hunan, China                    | Screening and enrollment                                | the H-REPLACE Investigators                                                                |
| Chunfeng                          | Liao       |                       | MM               | The First Hospital of Changsha                              | Changsha, Hunan, China                   | Screening and enrollment                                | the H-REPLACE Investigators                                                                |
| Dongsheng                         | Lin        |                       | MM               | The First Hospital of Changsha                              | Changsha, Hunan, China                   | Screening and enrollment                                | the H-REPLACE Investigators                                                                |
| Huijuan                           | Chen       |                       | MM               | The First Hospital of Changsha                              | Changsha, Hunan, China                   | Screening and enrollment                                | the H-REPLACE Investigators                                                                |
| Lixia                             | Ma         |                       | MM               | The First Hospital of Changsha                              | Changsha, Hunan, China                   | Screening and enrollment                                | the H-REPLACE Investigators                                                                |
| Hui                               | Luo        |                       | MD               | The First Hospital of Changsha                              | Changsha, Hunan, China                   | Screening and enrollment                                | the H-REPLACE Investigators                                                                |
| Jianfeng                          | Wu         |                       | MM               | The Second Affiliated Hospital of University of South China | Hengyang, Hunan, China                   | data collection                                         | the H-REPLACE Investigators                                                                |
| Chao                              | Yang       |                       | MM               | The Second Affiliated Hospital of University of South China | Hengyang, Hunan, China                   | Screening and enrollment                                | the H-REPLACE Investigators                                                                |

## Supplemental Online Content: Nonauthor Collaborators

\*First name, last name, and suffix (if applicable) are required and will appear in PubMed.

| *First Name and Middle Initial(s) | *Last Name | *Suffix (eg, Jr, III) | Academic Degrees | Institution                                                 | Location (city, state/province, country) | Role or Contribution, eg, chair, principal investigator | Group (if more than 1 Group listed in the byline) and/or Subgroup (eg, Steering Committee) |
|-----------------------------------|------------|-----------------------|------------------|-------------------------------------------------------------|------------------------------------------|---------------------------------------------------------|--------------------------------------------------------------------------------------------|
| Yang                              | Liu        |                       | MM               | The Second Affiliated Hospital of University of South China | Hengyang, Hunan, China                   | Screening and enrollment                                | the H-REPLACE Investigators                                                                |
| Yingnan                           | Qin        |                       | MM               | The Second Affiliated Hospital of University of South China | Hengyang, Hunan, China                   | Screening and enrollment                                | the H-REPLACE Investigators                                                                |
| Fangyao                           | Liu        |                       | MM               | The Second Affiliated Hospital of University of South China | Hengyang, Hunan, China                   | Screening and enrollment                                | the H-REPLACE Investigators                                                                |
| Jianqiang                         | Xu         |                       | MM               | The Second Affiliated Hospital of University of South China | Hengyang, Hunan, China                   | Screening and enrollment                                | the H-REPLACE Investigators                                                                |
| Juan                              | Tang       |                       | MM               | The Second Affiliated Hospital of University of South China | Hengyang, Hunan, China                   | Screening and enrollment                                | the H-REPLACE Investigators                                                                |
| Yixin                             | Tang       |                       | MD               | The First Affiliated Hospital of University of South China  | Hengyang, Hunan, China                   | data collection                                         | the H-REPLACE Investigators                                                                |
| Hengjing                          | Hu         |                       | MM               | The First Affiliated Hospital of University of South China  | Hengyang, Hunan, China                   | Screening and enrollment                                | the H-REPLACE Investigators                                                                |
| Jiming                            | Zhou       |                       | MM               | The First Affiliated Hospital of University of South China  | Hengyang, Hunan, China                   | Screening and enrollment                                | the H-REPLACE Investigators                                                                |
| Xing                              | Xiang      |                       | MM               | The First People's Hospital of Huaihua                      | Huaihua, Hunan,China                     | Screening and enrollment                                | the H-REPLACE Investigators                                                                |
| Jingyong                          | Yang       |                       | MM               | The First People's Hospital of Huaihua                      | Huaihua, Hunan,China                     | Screening and enrollment                                | the H-REPLACE Investigators                                                                |
| Tingting                          | Deng       |                       | MM               | The First People's Hospital of Huaihua                      | Huaihua, Hunan,China                     | Screening and enrollment                                | the H-REPLACE Investigators                                                                |
| Ping                              | Xiao       |                       | MM               | The First People's Hospital of Huaihua                      | Huaihua, Hunan,China                     | Screening and enrollment                                | the H-REPLACE Investigators                                                                |
| Jun                               | Liu        |                       | MM               | The First People's Hospital of Huaihua                      | Huaihua, Hunan,China                     | Screening and enrollment                                | the H-REPLACE Investigators                                                                |
| Shenyi                            | Guo        |                       | MM               | The First People's Hospital of Huaihua                      | Huaihua, Hunan,China                     | Screening and enrollment                                | the H-REPLACE Investigators                                                                |
| Wenjie                            | Liu        |                       | MM               | The First People's Hospital of Huaihua                      | Huaihua, Hunan,China                     | Screening and enrollment                                | the H-REPLACE Investigators                                                                |
| Xing                              | Zhang      |                       | MM               | The First People's Hospital of Huaihua                      | Huaihua, Hunan,China                     | Screening and enrollment                                | the H-REPLACE Investigators                                                                |

## Supplemental Online Content: Nonauthor Collaborators

\*First name, last name, and suffix (if applicable) are required and will appear in PubMed.

| *First Name and Middle Initial(s) | *Last Name | *Suffix (eg, Jr, III) | Academic Degrees | Institution                            | Location (city, state/province, country) | Role or Contribution, eg, chair, principal investigator | Group (if more than 1 Group listed in the byline) and/or Subgroup (eg, Steering Committee) |
|-----------------------------------|------------|-----------------------|------------------|----------------------------------------|------------------------------------------|---------------------------------------------------------|--------------------------------------------------------------------------------------------|
| Zhihong                           | Li         |                       | MM               | The First People's Hospital of Huaihua | Huaihua, Hunan,China                     | Screening and enrollment                                | the H-REPLACE Investigators                                                                |
| Renhua                            | Zeng       |                       | MM               | The First People's Hospital of Huaihua | Huaihua, Hunan,China                     | Screening and enrollment                                | the H-REPLACE Investigators                                                                |
| Zhen                              | Zhou       |                       | MD               | Yongzhou First People's Hospital       | Yongzhou, Hunan, China                   | Sub-investigator                                        | the H-REPLACE Investigators                                                                |
| Jianhong                          | Bao        |                       | MM               | Yongzhou First People's Hospital       | Yongzhou, Hunan, China                   | data collection                                         | the H-REPLACE Investigators                                                                |
| Ye                                | Zhou       |                       | MM               | Yongzhou First People's Hospital       | Yongzhou, Hunan, China                   | Screening and enrollment                                | the H-REPLACE Investigators                                                                |
| Xiaojuan                          | Wang       |                       | MM               | Yongzhou First People's Hospital       | Yongzhou, Hunan, China                   | Screening and enrollment                                | the H-REPLACE Investigators                                                                |
| He                                | Huang      |                       | MD               | Xiangtan Central Hospital              | Xiangtan, Hunan, China                   | Sub-investigator                                        | the H-REPLACE Investigators                                                                |
| Yunlong                           | Zhu        |                       | MD               | Xiangtan Central Hospital              | Xiangtan, Hunan, China                   | data collection                                         | the H-REPLACE Investigators                                                                |
| Wenjiao                           | Zhao       |                       | MM               | Xiangtan Central Hospital              | Xiangtan, Hunan, China                   | Screening and enrollment                                | the H-REPLACE Investigators                                                                |
| Xianming                          | Wu         |                       | MM               | Yiyang Central Hospital                | Yiyang, Hunan,China                      | Sub-investigator                                        | the H-REPLACE Investigators                                                                |
| Ming                              | Cai        |                       | MM               | Yiyang Central Hospital                | Yiyang, Hunan,China                      | data collection                                         | the H-REPLACE Investigators                                                                |
| Fan                               | Liu        |                       | MM               | Yiyang Central Hospital                | Yiyang, Hunan,China                      | Screening and enrollment                                | the H-REPLACE Investigators                                                                |
| Luping                            | Jiang      |                       | MD               | Changsha Central Hospital              | Changsha, Hunan, China                   | Sub-investigator                                        | the H-REPLACE Investigators                                                                |
| Zehua                             | Li         |                       | MM               | Changsha Central Hospital              | Changsha, Hunan, China                   | data collection                                         | the H-REPLACE Investigators                                                                |
| Songquan                          | Peng       |                       | MM               | Changsha Central Hospital              | Changsha, Hunan, China                   | Screening and enrollment                                | the H-REPLACE Investigators                                                                |
| Qiao                              | Jin        |                       | MM               | Changsha Central Hospital              | Changsha, Hunan, China                   | Screening and enrollment                                | the H-REPLACE Investigators                                                                |
| Chun                              | Chen       |                       | MM               | Changsha Central Hospital              | Changsha, Hunan, China                   | Screening and enrollment                                | the H-REPLACE Investigators                                                                |
| Lu                                | Hu         |                       | MM               | Changsha Central Hospital              | Changsha, Hunan, China                   | Screening and enrollment                                | the H-REPLACE Investigators                                                                |
| Ting                              | Zhou       |                       | MM               | Changsha Central Hospital              | Changsha, Hunan, China                   | Screening and enrollment                                | the H-REPLACE Investigators                                                                |
| Pengcui                           | Wu         |                       | MM               | Changsha Central Hospital              | Changsha, Hunan, China                   | Screening and enrollment                                | the H-REPLACE Investigators                                                                |

## Supplemental Online Content: Nonauthor Collaborators

\*First name, last name, and suffix (if applicable) are required and will appear in PubMed.

| *First Name and Middle Initial(s) | *Last Name | *Suffix (eg, Jr, III) | Academic Degrees | Institution                                                                                  | Location (city, state/province, country) | Role or Contribution, eg, chair, principal investigator | Group (if more than 1 Group listed in the byline) and/or Subgroup (eg, Steering Committee) |
|-----------------------------------|------------|-----------------------|------------------|----------------------------------------------------------------------------------------------|------------------------------------------|---------------------------------------------------------|--------------------------------------------------------------------------------------------|
| Xiao                              | Long       |                       | MM               | Changsha Central Hospital                                                                    | Changsha, Hunan, China                   | Screening and enrollment                                | the H-REPLACE Investigators                                                                |
| Yuyan                             | Huang      |                       | MM               | Changsha Central Hospital                                                                    | Changsha, Hunan, China                   | Screening and enrollment                                | the H-REPLACE Investigators                                                                |
| Hebin                             | Xie        |                       | MM               | Changsha Central Hospital                                                                    | Changsha, Hunan, China                   | Screening and enrollment                                | the H-REPLACE Investigators                                                                |
| Tao                               | Yang       |                       | MM               | Changsha Central Hospital                                                                    | Changsha, Hunan, China                   | Screening and enrollment                                | the H-REPLACE Investigators                                                                |
| Shao                              | Ouyang     |                       | MM               | The Second Affiliated Hospital of University of South China                                  | Hengyang, Hunan, China                   | data collection                                         | the H-REPLACE Investigators                                                                |
| Xiang                             | Liu        |                       | MD               | The Second People's Hospital of Hunan Province                                               | Changsha, Hunan, China                   | Screening and enrollment                                | the H-REPLACE Investigators                                                                |
| Song                              | Hu         |                       | MM               | The Second People's Hospital of Hunan Province                                               | Changsha, Hunan, China                   | Screening and enrollment                                | the H-REPLACE Investigators                                                                |
| Zhenhua                           | Xing       |                       | MM               | The Second People's Hospital of Hunan Province                                               | Changsha, Hunan, China                   | Screening and enrollment                                | the H-REPLACE Investigators                                                                |
| Jianping                          | Zeng       |                       | MD               | Xiangtan Central Hospital                                                                    | Xiangtan, Hunan, China                   | Member of Endpoint Adjudication Committee               | the H-REPLACE Investigators                                                                |
| Yi                                | Zhang      |                       | MD               | Hunan Provincial People's Hospital, The First Affiliated Hospital of Hunan Normal University | Changsha, Hunan, China                   | Member of Endpoint Adjudication Committee               | the H-REPLACE Investigators                                                                |
| Xiang                             | Liu        |                       | MD               | The Second People's Hospital of Hunan Province                                               | Changsha, Hunan, China                   | Member of Endpoint Adjudication Committee               | the H-REPLACE Investigators                                                                |
