# Supplementary material for: Effect of Rivaroxaban vs Enoxaparin on Major Cardiac Adverse Events and Bleeding Risk in the Acute Phase of Acute Coronary Syndrome: The H-REPLACE Randomized Equivalence and Noninferiority Trial
Source: PubMed Central journal article supplement (PMC9918885; doi:10.1001/jamanetworkopen.2022.55709), 2023-02-10
Supplement: jamanetwopen-e2255709-s004.pdf [file jamanetwopen-e2255709-s004.pdf]

## Data Sharing Statement

Zhou. Effect of Rivaroxaban vs Enoxaparin on Major Cardiac Adverse Events and Bleeding Risk in the Acute Phase of Acute Coronary Syndrome. *JAMA Netw Open*. Published February 10, 2023. doi:10.1001/jamanetworkopen.2022.55709

### Data

**Data available:** Yes

**Data types:** Data dictionary

**How to access data:** [zhoushenghua@csu.edu.cn](mailto:zhoushenghua@csu.edu.cn)

**When available:** With publication

### Supporting Documents

**Document types:** Statistical/analytic code, Informed consent form

**How to access documents:** [zhoushenghua@csu.edu.cn](mailto:zhoushenghua@csu.edu.cn)

**When available:** With publication

### Additional Information

**Who can access the data:** researchers whose proposed use of the data has been approved.

**Types of analyses:** For academic purpose.

**Mechanisms of data availability:** with a signed data access agreement
